# Supplementary material for: Designing thermally activated delayed fluorescence emitters with through-space charge transfer: a theoretical study
Source: Royal Society of Chemistry journal article supplement (doi:10.1039/d3cp05495k), 2024-01-01
Supplement: d3cp05495k1.pdf [file d3cp05495k1.pdf]

# Designing Thermally Activated Delayed Fluorescence Emitters with Through-Space Charge Transfer: A Theoretical Study

Jinhui Song<sup>1,2</sup>, Xin Lv<sup>1,2</sup>, Junjing Gu<sup>3</sup>, ChiYung Yam<sup>\*4</sup> and Lingyi Meng<sup>\*1,2,5</sup>

1. State Key Laboratory of Structural Chemistry, Fujian Institute of Research on the Structure of Matter, Chinese Academy of Sciences, Fuzhou, Fujian 350002, P.R. China
2. Fujian College, University of Chinese Academy of Sciences, Fuzhou, Fujian 350002, P. R. China.
3. State Key Laboratory of Physical Chemistry of Solid Surfaces, Fujian Provincial Key Laboratory of Theoretical and Computational Chemistry and College of Chemistry and Chemical Engineering, Xiamen University, Xiamen, Fujian 361005, China
4. Shenzhen Institute for Advanced Study, University of Electronic Science and Technology of China, Shenzhen, 518000, China
5. Xiamen Key Laboratory of Rare Earth Photoelectric Functional Materials, Xiamen Institute of Rare Earth Materials, Haixi Institutes, Chinese Academy of Sciences, Xiamen 361021, P. R. China

\*Corresponding authors. E-mail: yamcy@uestc.edu.cn (C.Y. Yam) and lymeng@fjirsm.ac.cn (L. Meng)

Table S1. The emission wavelengths (nm) are calculated using different functionals for AC-BO and QAC-BO in toluene. The corresponding experimental values in toluene are also listed for comparison.<sup>1</sup> The wavelengths are also given in eV in parentheses.

|        | B3LYP         | PBE0          | BMK                         | M062X         | CAM-B3LYP     | wB97XD        | LC-PBE        | Exp.          |
|--------|---------------|---------------|-----------------------------|---------------|---------------|---------------|---------------|---------------|
| HF%    | 20            | 25            | <b>42</b>                   | 54            | -             | -             | -             |               |
| AC-BO  | 503<br>(2.47) | 466<br>(2.66) | <b>405</b><br><b>(3.06)</b> | 370<br>(3.35) | 341<br>(3.64) | 339<br>(3.66) | 302<br>(4.11) | 432<br>(2.87) |
| QAC-BO | 494<br>(2.51) | 464<br>(2.67) | <b>407</b><br><b>(3.05)</b> | 368<br>(3.37) | 340<br>(3.65) | 339<br>(3.66) | 303<br>(4.09) | 415<br>(2.99) |

We studied the thin film configurations of AC-BO and QAC-BO by using the Materials Studio software with the Forcite module and the Universal force field.<sup>2</sup> To generate the initial configuration, a TADF molecule is placed within a box measuring approximately  $29.7 \times 29.7 \times 29.7$  Å and surrounded by 25 methyl methacrylate molecules. Subsequently, we conducted molecular dynamics simulations at 298K, with a total duration of 500 ps, and a time step of 0.1 fs. The chosen ensemble of dynamics is NVT, and the initial velocity is selected randomly.<sup>3</sup>

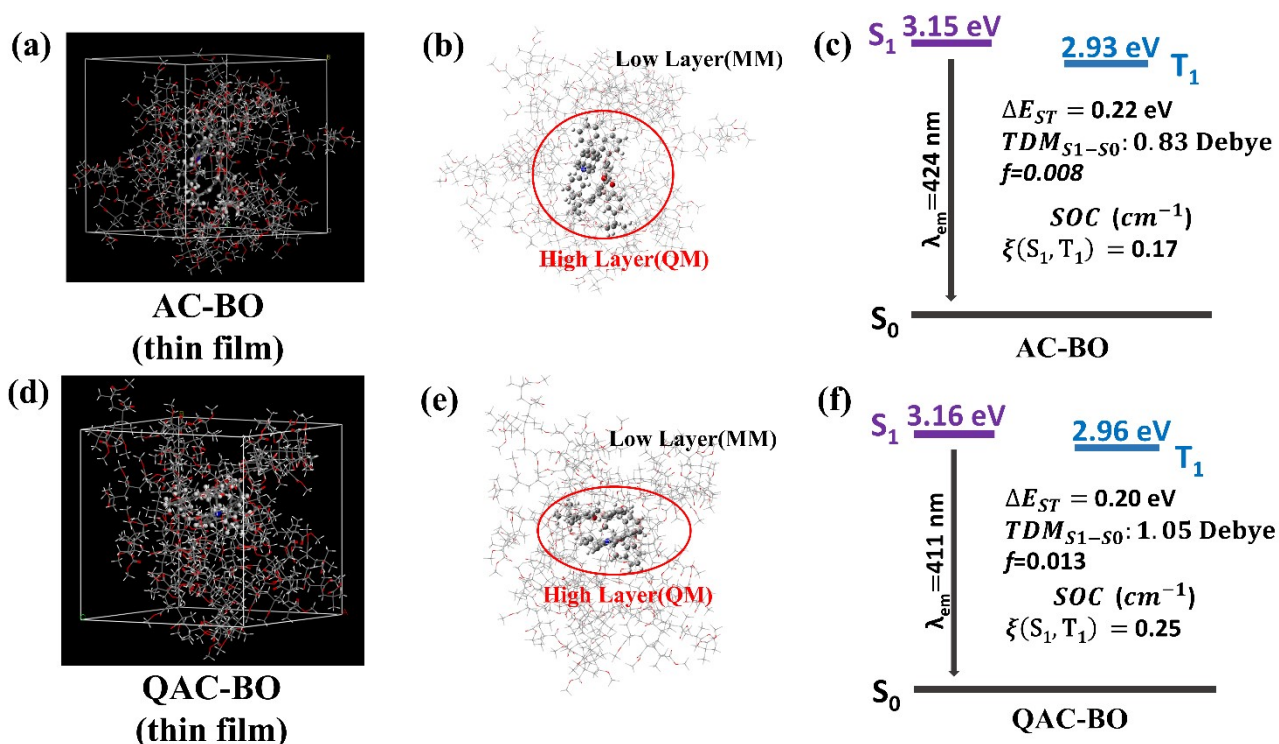

Figure S1. The thin film configuration of AC-BO (a) and QAC-BO (d). In the ONIOM model of (b) and (e), the AC-BO and QAC-BO as the high layer respectively, and surrounding methyl methacrylate molecules are

regarded as the low layer. Calculated oscillator strengths (f), TDMs between  $S_0$  and  $S_1$ , SOC between  $S_1$  and  $T_1$  at the BMK/6-311g\*\* level for (c) and (f).

Table S2. The dihedral angles of the optimized structures and experimental structures in crystal phase.<sup>1</sup>

|               | $\theta_{ph}(\text{°})$ | $\theta_D(\text{°})$ | $\theta_A(\text{°})$ | $\Delta\theta_{D-A}(\text{°})$ |
|---------------|-------------------------|----------------------|----------------------|--------------------------------|
| AC-BO(QM/MM)  | 89.72                   | 55.54                | 85.90                | 30.36                          |
| AC-BO(Cry.)   | 88.53                   | 54.97                | 86.05                | 31.08                          |
| QAC-BO(QM/MM) | 59.93                   | 86.94                | 86.29                | 0.65                           |
| QAC-BO(Cry.)  | 60.72                   | 82.50                | 82.93                | 0.43                           |

The root mean square displacements (RMSD) can be calculated based on the following formula<sup>4</sup>:

$$RMSD = \sqrt{\frac{1}{N} \sum_i^{natom} [(x_i - x_i')^2 + (y_i - y_i')^2 + (z_i - z_i')^2]} \quad S(1)$$

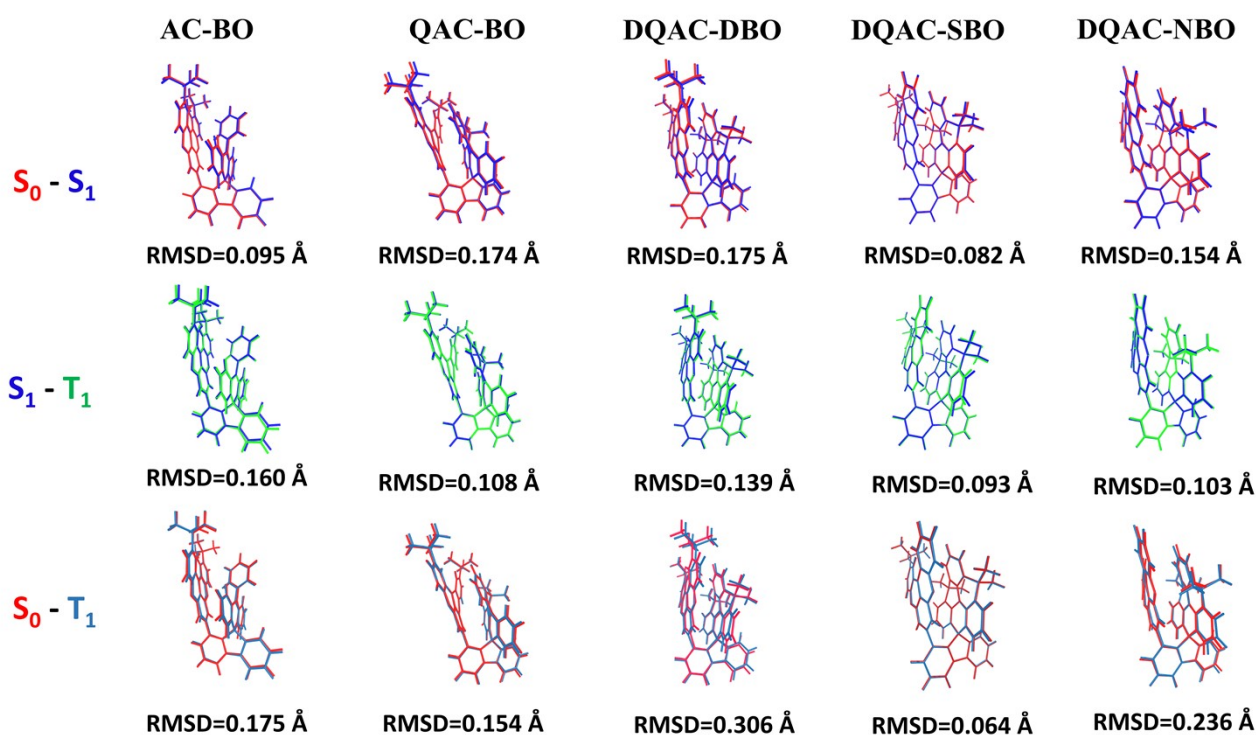

Figure S2. Molecular geometries and RMSD values in the gas state.

The independent gradient model (IGM) based on Hirshfeld partition of molecular density (IGMH) can clearly and intuitive demonstrate the intramolecular and intermolecular interactions, while the density gradient can be calculated as<sup>5,6</sup>:

$$\delta g(r) = g^{\text{IGM}}(r) - g(r). \quad \text{S (2)}$$

$$g^{\text{IGM}}(r) = \sum_i \text{abs}[\nabla \rho_i^{\text{free}}(r)]. \quad \text{S (3)}$$

$$G(r) = |\sum_i \nabla \rho_i(r)|. \quad \text{S (4)}$$

Here,  $\delta g(r)$  function equals the  $g^{\text{IGM}}(r)$  minus the initial molecular density gradient  $g(r)$ ,  $\rho_i^{\text{free}}(r)$  means the spherically averaged density of atom  $i$  in the free state,  $\nabla \rho_i^{\text{free}}(r)$  means the gradient vector.

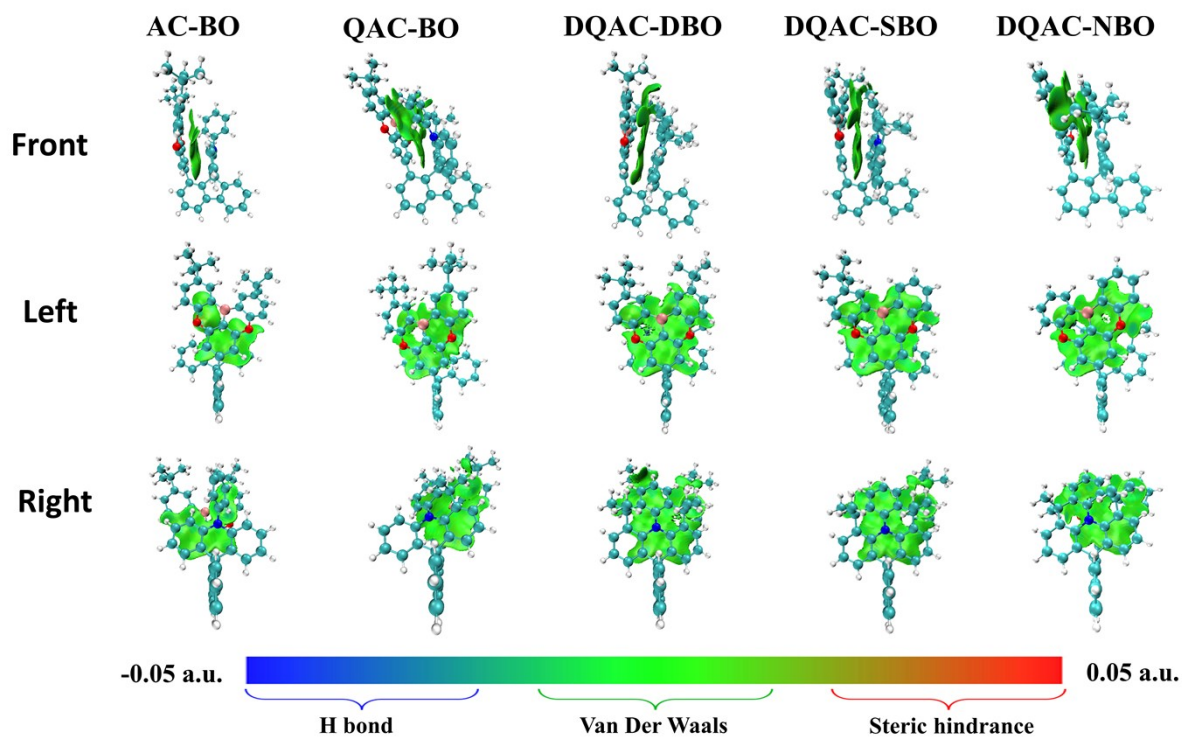

Figure S3. The inter-fragment intramolecular interaction for studied molecules measured by the IGMH method. (The iso-surface values are set as 0.004).

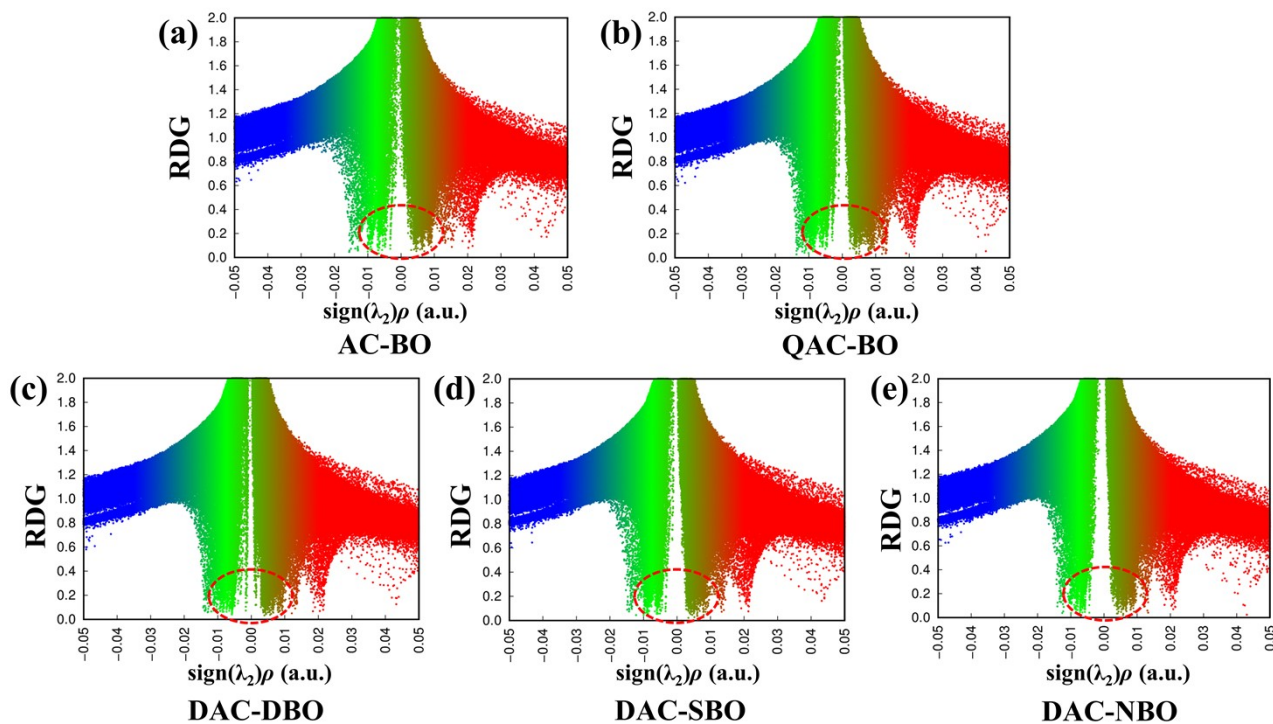

Figure S4. The scatter plot of RDG versus  $\text{sign}(\lambda_2)\rho$  for the investigated molecules in the gas state with the optimized  $S_1$  states.

The  $S(r)$  can be calculated by the following formula<sup>7,8</sup>:

$$S_r = \int \sqrt{\rho^{hole}(r)\rho^{ele}(r)} dr \quad S(5)$$

where  $\rho^{hole}$  and  $\rho^{ele}$  are the hole and electron density distributions, respectively.

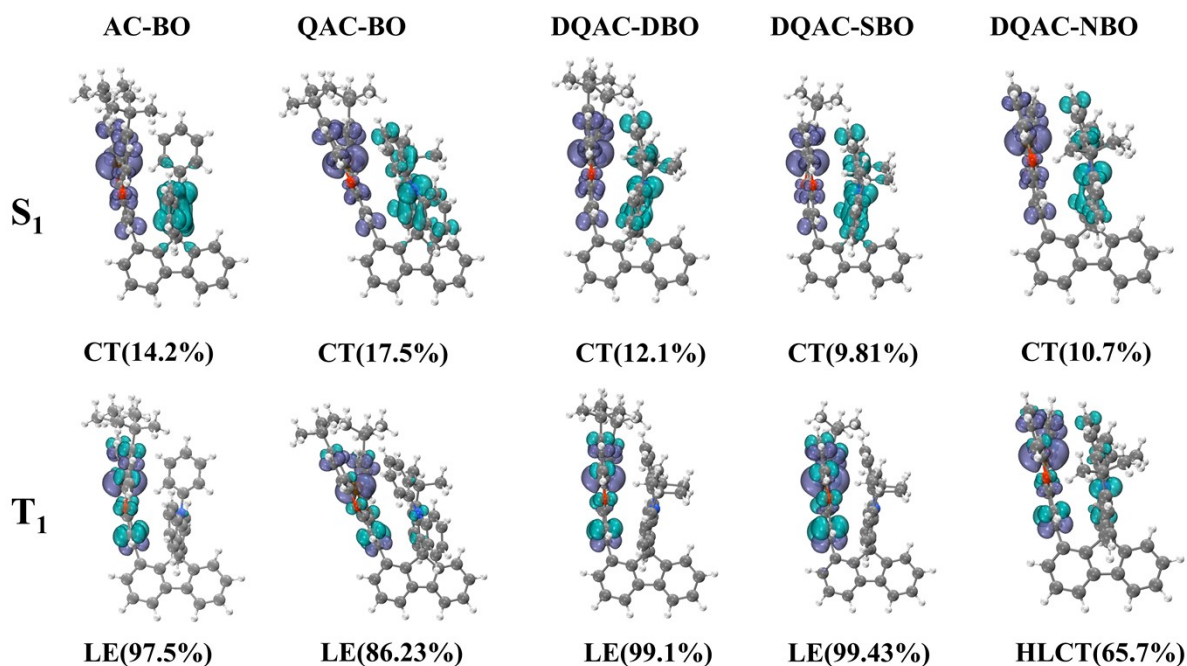

Figure S5. The hole–electron distribution and transition properties for the S<sub>1</sub> and T<sub>1</sub> states at the BMK/6-311g\*\* level. Blue represents holes, and purple represents electrons. The values in parentheses are the LE proportions in the excitation.

Table S3. The calculated radiative and nonradiative rates of S<sub>1</sub> (*K<sub>r</sub>*, *K<sub>nr</sub>*) and T<sub>1</sub> (*K<sub>r</sub>*, *K<sub>nr</sub>*), and the intersystem crossing rates and reverse intersystem crossing rates (*K<sub>ISC</sub>*, *K<sub>RISC</sub>*) obtained with the MOMAP for the thin film environment. The experimental values corresponding to the film made of 10 wt% emitters doped in polymethyl methacrylate are also listed for comparison.

| Molecule      |             | <i>K<sub>r</sub><sup>S</sup></i><br>(×10 <sup>6</sup> s <sup>-1</sup> ) | <i>K<sub>nr</sub><sup>S</sup></i><br>(×10 <sup>2</sup> s <sup>-1</sup> ) | <i>K<sub>r</sub><sup>T</sup></i><br>(s <sup>-1</sup> ) | <i>K<sub>nr</sub><sup>T</sup></i><br>(×10 <sup>-3</sup> s <sup>-1</sup> ) | <i>K<sub>ISC</sub></i><br>(×10 <sup>6</sup> s <sup>-1</sup> ) | <i>K<sub>RISC</sub></i><br>(×10 <sup>6</sup> s <sup>-1</sup> ) |
|---------------|-------------|-------------------------------------------------------------------------|--------------------------------------------------------------------------|--------------------------------------------------------|---------------------------------------------------------------------------|---------------------------------------------------------------|----------------------------------------------------------------|
| <b>AC-BO</b>  | <b>Exp.</b> | <b>5.10</b>                                                             |                                                                          |                                                        |                                                                           | <b>11.12</b>                                                  | <b>0.23</b>                                                    |
| (thin film)   | Cal.        | 3.05                                                                    | 0.39                                                                     | 3.64                                                   | 0.75                                                                      | 1.94                                                          | 0.85                                                           |
| <b>QAC-BO</b> | <b>Exp.</b> | <b>12.80</b>                                                            |                                                                          |                                                        |                                                                           | <b>10.90</b>                                                  | <b>16.10</b>                                                   |
| (thin film)   | Cal.        | 5.01                                                                    | 0.28                                                                     | 3.63                                                   | 0.69                                                                      | 27.88                                                         | 17.98                                                          |

In MOMAP software, the emission spectrum can be integrated to calculate the radiation rate <sup>2,9</sup>

$$k_r(T) = \int \sigma_{em}(\omega, T) d\omega \quad \text{S(6)}$$

The emission spectrum  $\sigma_{em}(\omega, T)$  can be expressed based on the following formula:

$$\sigma_{em}(\omega, T) = \frac{4\omega^3}{3\hbar c^3} |\mu_{fi}|^2 \sum_{u,v} P_{iv} |\langle \Theta_{fu} | \Theta_{iv} \rangle|^2 \delta(\omega_{iv, fu} - \omega) \quad \text{S(7)}$$

where  $\hbar$  is Planck's constant,  $c$  is the speed of light, and  $\omega$  is frequency.  $\mu_{fi} = \langle \Phi_f | \hat{\mu} | \Phi_i \rangle$  represents the transition dipole moment between two electronic states  $P_{iv}$  represents the Boltzmann distribution function and  $\Theta$  represents the nuclear vibrational wave function.

According to Fermi's Golden Rule, the non-radiative rate can be expressed as<sup>9,10</sup>:

$$k_{nr} = \frac{2\pi}{\hbar} \sum_{v,u} P_{iv} \left| H_{fu,iu} + \sum_{n,\mu} \frac{H_{fu,n\mu} H_{n\mu,iv}}{E_{iv} - E_{n\mu}} \right|^2 \delta(E_{iv} - E_{fu}) \quad \text{S(8)}$$

Here,  $H'$  represents the interaction between two different states, and it can be expressed as:

$$\hat{H}' \psi_{iv} = \hat{H}^{BO} \Phi_i(r; Q) \Theta_v(Q) + \hat{H}^{SO} \Phi_i(r; Q) \Theta_v(Q) \quad \text{S(9)}$$

where  $\hat{H}^{BO}$  is the nonadiabatic coupling, and  $\hat{H}^{SO}$  is the spin–orbit coupling. The intersystem crossing rates  $K_{ISC}$  between S<sub>1</sub> and T<sub>1</sub> can be expressed as<sup>11-13</sup>:

$$K_{ISC} = \frac{1}{\hbar^2} \langle \Phi_f | H^{SO} | \Phi_i \rangle \int_{-\infty}^{+\infty} dt [e^{i\omega_{if}t} Z_i^{-1} \rho_{ISC}(t, T)] \quad S(10)$$

where  $\rho_{ISC}(t, T)$  is the Franck-Condon overlap between singlet and triplet excited states, and  $Z_i$  is the distribution function.

Coordinates of optimized molecular structures at the BMK/6-311G\*\* level (unit: Å)

AC-BO (gas), S<sub>0</sub>

|   |             |             |             |
|---|-------------|-------------|-------------|
| C | -3.61595300 | 0.04917600  | -2.32244200 |
| C | -4.26528800 | 0.12567600  | -3.56432900 |
| C | -5.65706900 | 0.25060500  | -3.64429800 |
| C | -6.43322400 | 0.33221800  | -2.48540600 |
| C | -5.79106000 | 0.26410200  | -1.24846500 |
| C | -4.39812900 | 0.09832100  | -1.16715400 |
| C | -6.33152900 | 0.37949800  | 0.11762700  |
| C | -5.26994600 | 0.27557700  | 1.02900400  |
| C | -3.94125400 | 0.02518600  | 0.30351100  |
| C | -7.63762900 | 0.57840400  | 0.56905400  |
| C | -7.86099700 | 0.67373700  | 1.94540300  |
| C | -6.79672300 | 0.57181900  | 2.85194800  |
| C | -5.48923200 | 0.36853300  | 2.39618200  |
| C | -3.43517400 | -1.38042400 | 0.64683400  |
| C | -2.21068300 | -1.59187000 | 1.30634900  |
| N | -1.34503100 | -0.52368200 | 1.57138600  |
| C | -1.63354600 | 0.77481500  | 1.13156700  |
| C | -2.89891500 | 1.09649300  | 0.61190200  |
| C | -0.64138800 | 1.77981400  | 1.17102200  |
| C | -0.93327400 | 3.08030400  | 0.78258300  |
| C | -2.21770000 | 3.42133300  | 0.34926300  |
| C | -3.17915100 | 2.42099200  | 0.25967200  |
| C | -4.24655000 | -2.47789200 | 0.33592800  |
| C | -3.88953800 | -3.77666200 | 0.67867200  |
| C | -2.69797100 | -3.97943700 | 1.37953300  |
| C | -1.87309300 | -2.90737200 | 1.69542800  |
| C | -0.08678300 | -0.76347300 | 2.20417000  |
| C | 0.89249000  | -1.48669400 | 1.52646800  |
| C | 2.14837100  | -1.69000700 | 2.09609200  |
| C | 2.42232300  | -1.16456800 | 3.36174200  |
| C | 1.43538500  | -0.45016700 | 4.04954600  |
| C | 0.17768300  | -0.25105300 | 3.47644100  |
| C | -2.12227600 | 0.02439900  | -2.22490000 |
| C | -1.43300300 | -1.17674600 | -2.01077000 |
| C | -0.05336700 | -1.11909000 | -1.81854500 |
| C | 0.63727100  | 0.10305800  | -1.73531400 |
| C | -0.09665700 | 1.28102700  | -1.96605900 |
| C | -1.45230900 | 1.25446700  | -2.26463500 |
| B | 2.08037000  | 0.15742900  | -1.31241800 |

|   |             |             |             |
|---|-------------|-------------|-------------|
| C | 2.57392500  | 1.56960800  | -0.97612100 |
| C | 1.72045100  | 2.64176500  | -1.30659400 |
| O | 0.49742900  | 2.49050300  | -1.87193600 |
| O | 0.60640000  | -2.29133200 | -1.64931200 |
| C | 1.94370200  | -2.34691900 | -1.39866700 |
| C | 2.76308800  | -1.21373500 | -1.23329900 |
| C | 3.78700000  | 1.90139800  | -0.32202200 |
| C | 4.17711700  | 3.20389000  | -0.04073100 |
| C | 3.29787500  | 4.23973500  | -0.43622300 |
| C | 2.08776600  | 3.97220100  | -1.05173800 |
| C | 2.45118600  | -3.64411100 | -1.23335000 |
| C | 3.78847700  | -3.81791400 | -0.92015300 |
| C | 4.66949500  | -2.71975700 | -0.77999100 |
| C | 4.13089800  | -1.45170500 | -0.95507200 |
| C | 5.49606200  | 3.54810500  | 0.66963900  |
| C | 6.35855100  | 4.44165500  | -0.25428000 |
| C | 6.31385000  | 2.28782600  | 1.02252800  |
| C | 5.19051900  | 4.30969600  | 1.98213100  |
| C | 6.14666300  | -2.96225700 | -0.43154400 |
| C | 6.23299000  | -3.70189900 | 0.92563200  |
| C | 6.94227300  | -1.64524100 | -0.31395100 |
| C | 6.80354600  | -3.82919300 | -1.53242100 |
| H | -3.66852400 | 0.09577400  | -4.47091800 |
| H | -6.13276200 | 0.30234600  | -4.61857100 |
| H | -7.51023300 | 0.45720000  | -2.54442600 |
| H | -8.46121500 | 0.66026400  | -0.13414100 |
| H | -8.86855000 | 0.82996300  | 2.31769600  |
| H | -6.99063800 | 0.65071700  | 3.91698300  |
| H | -4.65815000 | 0.28344100  | 3.09025300  |
| H | 0.36655200  | 1.52993300  | 1.47889000  |
| H | -0.14072600 | 3.82186800  | 0.80102900  |
| H | -2.45464300 | 4.43958800  | 0.06089400  |
| H | -4.16968500 | 2.64674100  | -0.12681300 |
| H | -5.18452400 | -2.29327800 | -0.17938700 |
| H | -4.53423600 | -4.61020200 | 0.42273700  |
| H | -2.40478400 | -4.97833000 | 1.68691100  |
| H | -0.96007800 | -3.08816700 | 2.24617900  |
| H | 0.63431100  | -1.91270500 | 0.57122100  |
| H | 2.90077600  | -2.24295200 | 1.53941600  |
| H | 3.39762100  | -1.31144400 | 3.81439600  |
| H | 1.64547600  | -0.04629600 | 5.03487100  |
| H | -0.59068400 | 0.31834700  | 3.98921700  |
| H | -1.95449700 | -2.12603600 | -1.96421800 |
| H | -1.99461400 | 2.18239700  | -2.39382000 |
| H | 4.41724600  | 1.08344600  | -0.00585700 |
| H | 3.56121400  | 5.27488200  | -0.24231000 |
| H | 1.40319900  | 4.76454000  | -1.33523900 |
| H | 1.77787800  | -4.48705100 | -1.34607600 |
| H | 4.16013400  | -4.82897500 | -0.78591200 |



|   |            |             |             |
|---|------------|-------------|-------------|
| H | 4.77619700 | -0.58874600 | -0.88234800 |
| H | 6.58385100 | 3.92033900  | -1.19041500 |
| H | 5.84727300 | 5.37705100  | -0.50051000 |
| H | 7.30332300 | 4.69380400  | 0.24038200  |
| H | 5.76348400 | 1.63335600  | 1.70659200  |
| H | 6.57669300 | 1.71435900  | 0.12658600  |
| H | 7.24456100 | 2.58462600  | 1.51647700  |
| H | 4.57610900 | 3.69461800  | 2.64775400  |
| H | 6.12361500 | 4.55894000  | 2.49990400  |
| H | 4.65285800 | 5.24270600  | 1.78835000  |
| H | 5.72131900 | -4.66826100 | 0.89042700  |
| H | 7.28058800 | -3.88352900 | 1.19060600  |
| H | 5.77380400 | -3.10191700 | 1.71834200  |
| H | 6.94343200 | -1.09311400 | -1.25963000 |
| H | 6.53490600 | -0.99528700 | 0.46878500  |
| H | 7.98178200 | -1.87045400 | -0.05524000 |
| H | 6.74562500 | -3.32506200 | -2.50257400 |
| H | 7.85843100 | -4.00553300 | -1.29393100 |
| H | 6.31175300 | -4.80212800 | -1.62454900 |

AC-BO (gas), S<sub>1</sub>

|   |             |             |             |
|---|-------------|-------------|-------------|
| C | -3.64697600 | -0.07421200 | -2.31404900 |
| C | -4.32702300 | -0.06036400 | -3.54350100 |
| C | -5.72145000 | 0.05165500  | -3.60721300 |
| C | -6.48539700 | 0.17732900  | -2.44414500 |
| C | -5.82345900 | 0.16873100  | -1.21590200 |
| C | -4.42838600 | 0.02284200  | -1.16074700 |
| C | -6.34145600 | 0.33299500  | 0.15309400  |
| C | -5.26654300 | 0.27916700  | 1.05340200  |
| C | -3.94534000 | 0.01942400  | 0.30704300  |
| C | -7.64051700 | 0.53309800  | 0.62315500  |
| C | -7.84046000 | 0.67926400  | 1.99908800  |
| C | -6.76172700 | 0.62648700  | 2.89115000  |
| C | -5.45937500 | 0.42181600  | 2.41967700  |
| C | -3.41798100 | -1.35319300 | 0.69927400  |
| C | -2.15316100 | -1.51836800 | 1.30640000  |
| N | -1.29188400 | -0.43221700 | 1.43716100  |
| C | -1.61320200 | 0.82985400  | 0.99359100  |
| C | -2.93061900 | 1.11915300  | 0.54585000  |
| C | -0.62086200 | 1.85016000  | 0.97252700  |
| C | -0.97291500 | 3.14087100  | 0.63895900  |
| C | -2.30450900 | 3.44990800  | 0.32024400  |
| C | -3.26252800 | 2.43752700  | 0.25760800  |
| C | -4.22168700 | -2.47491900 | 0.50261200  |
| C | -3.81196400 | -3.73986500 | 0.91508200  |
| C | -2.58318100 | -3.89202100 | 1.57178600  |
| C | -1.76348200 | -2.79738600 | 1.77762100  |
| C | -0.02174900 | -0.62304600 | 2.09045500  |

|   |             |             |             |
|---|-------------|-------------|-------------|
| C | 0.94557700  | -1.39778200 | 1.46040700  |
| C | 2.19040000  | -1.56767200 | 2.06437800  |
| C | 2.44406300  | -0.96630500 | 3.29850600  |
| C | 1.45896000  | -0.19615700 | 3.92969800  |
| C | 0.21599100  | -0.01465500 | 3.32473100  |
| C | -2.15563900 | -0.08554000 | -2.22688700 |
| C | -1.43175000 | -1.27326600 | -2.02177400 |
| C | -0.05264500 | -1.19604000 | -1.83420800 |
| C | 0.63641500  | 0.03084300  | -1.76086400 |
| C | -0.12058100 | 1.19368800  | -2.00375800 |
| C | -1.48568200 | 1.15279800  | -2.25822700 |
| B | 2.08865200  | 0.10571000  | -1.35820900 |
| C | 2.55790700  | 1.52487000  | -1.02841200 |
| C | 1.69455600  | 2.59958400  | -1.36325900 |
| O | 0.46764300  | 2.42029200  | -1.95836900 |
| O | 0.61913400  | -2.36881900 | -1.64904600 |
| C | 1.97425400  | -2.41262400 | -1.37894500 |
| C | 2.77436200  | -1.25120900 | -1.22985100 |
| C | 3.76204000  | 1.89326500  | -0.37089500 |
| C | 4.13054800  | 3.21149500  | -0.09469000 |
| C | 3.24657600  | 4.23372500  | -0.48547300 |
| C | 2.03129800  | 3.92603000  | -1.10704000 |
| C | 2.47825700  | -3.68970200 | -1.16332600 |
| C | 3.82351900  | -3.86196000 | -0.80898800 |
| C | 4.68091900  | -2.75357100 | -0.68786800 |
| C | 4.13942300  | -1.48605100 | -0.91422200 |
| C | 5.45660600  | 3.57037900  | 0.59991200  |
| C | 6.30647400  | 4.45720700  | -0.34207700 |
| C | 6.28938500  | 2.32194000  | 0.96139700  |
| C | 5.16498600  | 4.34737400  | 1.90632500  |
| C | 6.15689300  | -2.96539800 | -0.30440000 |
| C | 6.23237400  | -3.66012900 | 1.07677800  |
| C | 6.94074900  | -1.63857400 | -0.21477600 |
| C | 6.84574000  | -3.85941600 | -1.36328600 |
| H | -3.74408200 | -0.12825700 | -4.45661000 |
| H | -6.21134400 | 0.05692600  | -4.57586800 |
| H | -7.56410100 | 0.28974000  | -2.49321400 |
| H | -8.47722900 | 0.57754600  | -0.06732200 |
| H | -8.84347100 | 0.83765600  | 2.38215400  |
| H | -6.93764000 | 0.74500500  | 3.95532100  |
| H | -4.61808800 | 0.37561200  | 3.10520100  |
| H | 0.41626100  | 1.60002900  | 1.15794600  |
| H | -0.19958800 | 3.89808300  | 0.58643900  |
| H | -2.58097300 | 4.46906700  | 0.07234200  |
| H | -4.27706700 | 2.65673100  | -0.06083200 |
| H | -5.18652900 | -2.34235700 | 0.02403800  |
| H | -4.45167800 | -4.59894200 | 0.74461600  |
| H | -2.26624500 | -4.86753900 | 1.92309900  |
| H | -0.82040400 | -2.91783100 | 2.29088900  |

|   |             |             |             |
|---|-------------|-------------|-------------|
| H | 0.70797900  | -1.86933100 | 0.52206900  |
| H | 2.94813500  | -2.14964800 | 1.54749700  |
| H | 3.41267200  | -1.08992500 | 3.77130100  |
| H | 1.66068700  | 0.26894500  | 4.88866900  |
| H | -0.55425000 | 0.59475600  | 3.78578700  |
| H | -1.92722300 | -2.23794900 | -1.99368900 |
| H | -2.03052500 | 2.07781700  | -2.40613900 |
| H | 4.41306600  | 1.09039400  | -0.05817400 |
| H | 3.49440600  | 5.27482900  | -0.30745200 |
| H | 1.34044400  | 4.70605100  | -1.41187700 |
| H | 1.81109300  | -4.53896200 | -1.26895800 |
| H | 4.19354600  | -4.86730600 | -0.63888600 |
| H | 4.78013100  | -0.61902600 | -0.85673600 |
| H | 6.51845500  | 3.92573900  | -1.27554700 |
| H | 5.78611800  | 5.38637500  | -0.59217800 |
| H | 7.25815000  | 4.71726100  | 0.13641600  |
| H | 5.74812700  | 1.66910000  | 1.65412000  |
| H | 6.54820200  | 1.74012900  | 0.07029300  |
| H | 7.22137100  | 2.63212600  | 1.44572300  |
| H | 4.56139100  | 3.73625600  | 2.58581800  |
| H | 6.10242400  | 4.60852300  | 2.41150100  |
| H | 4.61784000  | 5.27324500  | 1.70574800  |
| H | 5.72729600  | -4.63033400 | 1.06403100  |
| H | 7.27749100  | -3.82260200 | 1.36555000  |
| H | 5.75496300  | -3.03773600 | 1.84155200  |
| H | 6.95263800  | -1.11802000 | -1.17777400 |
| H | 6.51006600  | -0.96547700 | 0.53507600  |
| H | 7.97739400  | -1.84540600 | 0.07144500  |
| H | 6.79237600  | -3.38860600 | -2.35027800 |
| H | 7.90041600  | -4.01120900 | -1.10484200 |
| H | 6.36685900  | -4.84061900 | -1.42980500 |

AC-BO (gas), T<sub>1</sub>

|   |             |             |             |
|---|-------------|-------------|-------------|
| C | -3.59399600 | -0.22491600 | -2.29321200 |
| C | -4.21253300 | -0.34749100 | -3.54849200 |
| C | -5.60195700 | -0.24662900 | -3.68494300 |
| C | -6.41175700 | 0.00258100  | -2.57374200 |
| C | -5.80553400 | 0.11864200  | -1.32260600 |
| C | -4.41443500 | -0.01816300 | -1.18322500 |
| C | -6.38697500 | 0.38980700  | 0.00394500  |
| C | -5.35497400 | 0.38820600  | 0.95457500  |
| C | -4.00432800 | 0.06069500  | 0.30120600  |
| C | -7.70630200 | 0.63290900  | 0.39006600  |
| C | -7.97269500 | 0.87793300  | 1.73995500  |
| C | -6.93796700 | 0.87808000  | 2.68520600  |
| C | -5.61678000 | 0.62890600  | 2.29590100  |
| C | -3.52076200 | -1.31242500 | 0.77941800  |
| C | -2.24606800 | -1.50126500 | 1.34056500  |
| N | -1.33232200 | -0.43712700 | 1.42009300  |

|   |             |             |             |
|---|-------------|-------------|-------------|
| C | -1.66561200 | 0.84600700  | 1.01469000  |
| C | -2.96621500 | 1.14796200  | 0.54596600  |
| C | -0.69251100 | 1.87632600  | 1.03918200  |
| C | -1.03448600 | 3.17469100  | 0.70043100  |
| C | -2.34663700 | 3.49281000  | 0.32675900  |
| C | -3.28977200 | 2.47458400  | 0.24027900  |
| C | -4.38363800 | -2.40791300 | 0.66238400  |
| C | -4.02136100 | -3.67566100 | 1.10309400  |
| C | -2.76877700 | -3.85086300 | 1.69728400  |
| C | -1.89240000 | -2.78094600 | 1.82105200  |
| C | -0.08062500 | -0.64277400 | 2.09297200  |
| C | 0.91784000  | -1.38227900 | 1.46761700  |
| C | 2.14791500  | -1.57818700 | 2.09485400  |
| C | 2.36966700  | -1.02762500 | 3.35890300  |
| C | 1.35975000  | -0.29460600 | 3.99278000  |
| C | 0.12863400  | -0.10270400 | 3.36424600  |
| C | -2.10704900 | -0.20982600 | -2.15654000 |
| C | -1.33743000 | -1.36252100 | -2.01461500 |
| C | 0.06049200  | -1.24832700 | -1.82743100 |
| C | 0.72714600  | -0.01341300 | -1.71250100 |
| C | -0.07263700 | 1.12381800  | -1.89509700 |
| C | -1.45926800 | 1.04997600  | -2.11249400 |
| B | 2.17954600  | 0.08943300  | -1.34188900 |
| C | 2.62006000  | 1.51941800  | -1.02481900 |
| C | 1.70655300  | 2.57359100  | -1.30896100 |
| O | 0.45790400  | 2.35400000  | -1.83401600 |
| O | 0.74557200  | -2.39723600 | -1.69512400 |
| C | 2.09000400  | -2.43350800 | -1.37170200 |
| C | 2.87795100  | -1.26472500 | -1.20343800 |
| C | 3.83922200  | 1.92969000  | -0.42833400 |
| C | 4.16826300  | 3.26068000  | -0.16332300 |
| C | 3.23076200  | 4.25886900  | -0.50582400 |
| C | 2.00376900  | 3.91430600  | -1.06948000 |
| C | 2.58875600  | -3.71339000 | -1.15338300 |
| C | 3.92284600  | -3.87952000 | -0.77383100 |
| C | 4.77158300  | -2.76555600 | -0.62897600 |
| C | 4.23095300  | -1.49611800 | -0.85719500 |
| C | 5.50587100  | 3.66538300  | 0.47763100  |
| C | 6.28012200  | 4.58701700  | -0.49618600 |
| C | 6.39815000  | 2.44853100  | 0.80150400  |
| C | 5.23330700  | 4.42695200  | 1.79791000  |
| C | 6.23877500  | -2.97329400 | -0.21668200 |
| C | 6.28475100  | -3.66297600 | 1.16856400  |
| C | 7.01878600  | -1.64505100 | -0.11904500 |
| C | 6.94673500  | -3.87109400 | -1.26030400 |
| H | -3.59041000 | -0.50662400 | -4.42398600 |
| H | -6.04996600 | -0.34568000 | -4.66861000 |
| H | -7.48744100 | 0.10513200  | -2.68027600 |
| H | -8.50703600 | 0.63448400  | -0.34346800 |

|   |             |             |             |
|---|-------------|-------------|-------------|
| H | -8.99120500 | 1.07175600  | 2.06109600  |
| H | -7.16486100 | 1.07255300  | 3.72857800  |
| H | -4.80961800 | 0.62281100  | 3.02250100  |
| H | 0.33516900  | 1.63969500  | 1.28850700  |
| H | -0.25958500 | 3.93420200  | 0.70285300  |
| H | -2.61845400 | 4.51318700  | 0.07940800  |
| H | -4.30103400 | 2.68828400  | -0.09485800 |
| H | -5.36161600 | -2.24790400 | 0.21901300  |
| H | -4.70716400 | -4.50907000 | 0.99747300  |
| H | -2.46839900 | -4.82504300 | 2.06923400  |
| H | -0.92953100 | -2.93451900 | 2.28793900  |
| H | 0.70341700  | -1.82629700 | 0.51116400  |
| H | 2.92048900  | -2.14212700 | 1.57873800  |
| H | 3.32582700  | -1.16696200 | 3.85276200  |
| H | 1.53120300  | 0.12934500  | 4.97694800  |
| H | -0.65954000 | 0.47606300  | 3.83491800  |
| H | -1.79277500 | -2.34775800 | -2.00859500 |
| H | -2.02505300 | 1.97025800  | -2.20352500 |
| H | 4.53825200  | 1.15476800  | -0.15241400 |
| H | 3.45138700  | 5.30521200  | -0.32606600 |
| H | 1.26433000  | 4.66553800  | -1.32745800 |
| H | 1.92410400  | -4.56233100 | -1.27490900 |
| H | 4.29552600  | -4.88268100 | -0.59847600 |
| H | 4.86983800  | -0.63048100 | -0.76932100 |
| H | 6.47816000  | 4.06621800  | -1.43871700 |
| H | 5.71478000  | 5.49574300  | -0.72225000 |
| H | 7.23789100  | 4.88314800  | -0.05305600 |
| H | 5.91138400  | 1.77565100  | 1.51515600  |
| H | 6.64520100  | 1.87914500  | -0.10079300 |
| H | 7.33566200  | 2.79429500  | 1.24899700  |
| H | 4.67667100  | 3.79334700  | 2.49632000  |
| H | 6.18033900  | 4.71601600  | 2.26788200  |
| H | 4.65013500  | 5.33579000  | 1.62391700  |
| H | 5.78421300  | -4.63534500 | 1.14864700  |
| H | 7.32433900  | -3.82080900 | 1.47791100  |
| H | 5.78974100  | -3.04028700 | 1.92133100  |
| H | 7.04619800  | -1.12751900 | -1.08346900 |
| H | 6.57830200  | -0.97107000 | 0.62395800  |
| H | 8.05076700  | -1.85093100 | 0.18319300  |
| H | 6.91234700  | -3.40526000 | -2.25051300 |
| H | 7.99616100  | -4.01837500 | -0.98036000 |
| H | 6.47346800  | -4.85458400 | -1.33074200 |

QAC-BO (gas), S<sub>0</sub>

|   |             |             |             |
|---|-------------|-------------|-------------|
| C | -0.84737500 | -0.77948800 | -1.45403300 |
| C | -0.30886200 | -2.04569300 | -1.16729200 |

|   |             |             |             |
|---|-------------|-------------|-------------|
| C | 1.05620200  | -2.31077100 | -1.28891300 |
| C | 1.88756600  | -1.29561200 | -1.77943800 |
| C | 1.36894000  | -0.05199600 | -2.16467700 |
| C | 0.02183100  | 0.20137100  | -1.96185500 |
| B | -2.28404900 | -0.45796300 | -1.15754400 |
| C | -3.13228100 | -1.67590800 | -0.78577700 |
| C | -2.44904000 | -2.89031100 | -0.58434400 |
| O | -1.10509600 | -3.04256400 | -0.72205400 |
| O | -0.43271100 | 1.43317400  | -2.28165700 |
| C | -1.64750200 | 1.87077800  | -1.86741500 |
| C | -2.61386800 | 1.03817100  | -1.26119300 |
| C | -4.53299400 | -1.68523200 | -0.58284200 |
| C | -5.23692700 | -2.80461500 | -0.15700700 |
| C | -4.49312400 | -3.99016200 | 0.05419000  |
| C | -3.12711800 | -4.04337400 | -0.16236300 |
| C | -1.88471100 | 3.23564900  | -2.06425700 |
| C | -3.05576900 | 3.80675900  | -1.58038500 |
| C | -4.00486000 | 3.04389300  | -0.87025500 |
| C | -3.75978100 | 1.67672100  | -0.74817900 |
| C | -6.75509100 | -2.80277900 | 0.08380700  |
| C | -7.38337600 | -1.41690300 | -0.17081200 |
| C | -5.23304400 | 3.65615300  | -0.17663100 |
| C | -5.40400600 | 5.15378100  | -0.50058200 |
| C | 5.67360200  | -0.88558100 | -1.59317100 |
| C | 6.45285500  | 0.00227700  | -0.71554600 |
| C | 5.58486100  | 0.57046600  | 0.22497800  |
| C | 4.31445100  | -0.81275400 | -1.22855800 |
| C | 3.35436600  | -1.50590300 | -1.97164000 |
| C | 3.79490100  | -2.33469900 | -3.01823500 |
| C | 5.14995400  | -2.44032400 | -3.34276900 |
| C | 6.10216200  | -1.69544000 | -2.64399400 |
| C | 7.81231500  | 0.32098300  | -0.71320700 |
| C | 8.28337500  | 1.22387300  | 0.24346100  |
| C | 7.40974700  | 1.79450200  | 1.17972300  |
| C | 6.04946900  | 1.46642400  | 1.17786800  |
| C | -7.42836600 | -3.82289700 | -0.86587300 |
| C | -7.04392800 | -3.20080800 | 1.55163600  |
| C | -6.52086400 | 2.91781300  | -0.61480500 |
| C | -5.04670800 | 3.50474900  | 1.35399700  |
| C | 1.95678700  | 1.13492000  | 0.74183800  |
| C | 3.14279900  | 1.16179000  | -0.00245300 |
| C | 4.15851700  | 0.02405200  | 0.06413800  |
| C | 3.86391800  | -0.91015200 | 1.25363400  |
| C | 2.65450600  | -0.83876800 | 1.96036100  |
| N | 1.63141900  | 0.03157100  | 1.54358200  |
| C | 1.04777400  | 2.21834700  | 0.69631700  |
| C | 1.26828100  | 3.23330200  | -0.22976100 |
| C | 2.42646500  | 3.24636000  | -1.01623900 |
| C | 3.37536200  | 2.24323600  | -0.86017500 |

|   |             |             |             |
|---|-------------|-------------|-------------|
| C | 4.84408900  | -1.81967800 | 1.67957800  |
| C | 4.66145500  | -2.61991200 | 2.79954700  |
| C | 3.48613100  | -2.48522600 | 3.54719800  |
| C | 2.50090900  | -1.59867100 | 3.13923600  |
| C | 0.26447500  | -0.23464500 | 1.79427400  |
| C | -0.21948500 | -1.54856300 | 1.90570200  |
| C | -1.56675700 | -1.77937500 | 2.15336600  |
| C | -2.46311200 | -0.71093200 | 2.22876900  |
| C | -1.99218500 | 0.58869000  | 2.06288400  |
| C | -0.63003500 | 0.84673000  | 1.86756700  |
| C | -0.04116700 | 2.25167900  | 1.77400400  |
| C | 0.65832500  | 2.57282400  | 3.13055300  |
| C | -1.11569100 | 3.32092100  | 1.52303700  |
| H | 1.45427100  | -3.27988500 | -1.01069300 |
| H | 2.01046000  | 0.72763200  | -2.55229700 |
| H | -5.06440300 | -0.76545000 | -0.78571000 |
| H | -4.99908700 | -4.89133000 | 0.38649400  |
| H | -2.56109300 | -4.95571900 | -0.00673600 |
| H | -1.12742500 | 3.82843800  | -2.56601500 |
| H | -3.20371500 | 4.86956700  | -1.72929300 |
| H | -4.45895300 | 1.06680500  | -0.18751200 |
| H | -6.95132800 | -0.65458400 | 0.48730100  |
| H | -7.24702000 | -1.09880500 | -1.20948100 |
| H | -8.45879400 | -1.46177900 | 0.02850200  |
| H | -5.51675400 | 5.31726700  | -1.57765600 |
| H | -4.55206600 | 5.74174700  | -0.14417000 |
| H | -6.30230300 | 5.53481700  | -0.00441500 |
| H | 3.05285900  | -2.87422300 | -3.59903200 |
| H | 5.45654100  | -3.08514600 | -4.16020700 |
| H | 7.15361100  | -1.74295800 | -2.91070100 |
| H | 8.48693900  | -0.11859200 | -1.44187400 |
| H | 9.33562900  | 1.48967900  | 0.26114800  |
| H | 7.79369500  | 2.49731200  | 1.91233200  |
| H | 5.36433700  | 1.90062800  | 1.89987800  |
| H | -7.05600800 | -4.83710400 | -0.69297800 |
| H | -7.23145800 | -3.56142500 | -1.91065100 |
| H | -8.51254500 | -3.82874700 | -0.70624400 |
| H | -6.66074700 | -4.19930900 | 1.78168100  |
| H | -6.57710400 | -2.48990800 | 2.24131100  |
| H | -8.12422400 | -3.20417800 | 1.73516400  |
| H | -6.48896100 | 1.85390400  | -0.35932400 |
| H | -6.66180100 | 3.00292300  | -1.69725100 |
| H | -7.39245000 | 3.35494900  | -0.11489000 |
| H | -4.97684000 | 2.45033200  | 1.64065100  |
| H | -4.12755300 | 4.00576900  | 1.67674500  |
| H | -5.89454100 | 3.94858500  | 1.88833100  |
| H | 0.54692700  | 4.03547200  | -0.33201500 |
| H | 2.59502300  | 4.05232500  | -1.72243600 |
| H | 4.29544200  | 2.25842500  | -1.43755000 |

|   |             |             |            |
|---|-------------|-------------|------------|
| H | 5.76982000  | -1.88648600 | 1.11767900 |
| H | 5.43279600  | -3.31982800 | 3.10199700 |
| H | 3.34114700  | -3.06368200 | 4.45398300 |
| H | 1.59543300  | -1.48669400 | 3.72340100 |
| H | 0.45711000  | -2.38378900 | 1.77383500 |
| H | -1.92792900 | -2.79921700 | 2.22943500 |
| H | -3.52222100 | -0.89742400 | 2.37119300 |
| H | -2.69559900 | 1.41365400  | 2.07571700 |
| H | 1.42801500  | 1.83024300  | 3.35923700 |
| H | 1.12749700  | 3.56107900  | 3.08006800 |
| H | -0.08338100 | 2.56719800  | 3.93616300 |
| H | -1.67756800 | 3.12036900  | 0.61041000 |
| H | -0.65764600 | 4.31126800  | 1.45205800 |
| H | -1.81342800 | 3.34954100  | 2.36481400 |

QAC-BO (gas), S<sub>1</sub>

|   |             |             |             |
|---|-------------|-------------|-------------|
| C | -0.80403000 | -0.66668200 | -1.56131000 |
| C | -0.24370200 | -1.94700100 | -1.37646500 |
| C | 1.11816100  | -2.19928300 | -1.51527100 |
| C | 1.96864300  | -1.14360700 | -1.90034700 |
| C | 1.42927100  | 0.12535300  | -2.17998200 |
| C | 0.07541000  | 0.34926100  | -1.98896200 |
| B | -2.24548000 | -0.37427100 | -1.25755500 |
| C | -3.06756800 | -1.60505300 | -0.88809300 |
| C | -2.38714600 | -2.84610400 | -0.79152400 |
| O | -1.03408500 | -2.98358100 | -0.97765400 |
| O | -0.38936700 | 1.60200500  | -2.24660600 |
| C | -1.62085200 | 2.01269700  | -1.80713900 |
| C | -2.58662300 | 1.11762700  | -1.26662100 |
| C | -4.45799700 | -1.64007700 | -0.59959500 |
| C | -5.14296700 | -2.79017700 | -0.20160400 |
| C | -4.40781700 | -3.98700400 | -0.10944600 |
| C | -3.04214200 | -4.01518600 | -0.41396100 |
| C | -1.86403200 | 3.37518500  | -1.92490700 |
| C | -3.06482300 | 3.92549000  | -1.44094400 |
| C | -4.01183500 | 3.10915100  | -0.81011800 |
| C | -3.74933500 | 1.73142900  | -0.74720500 |
| C | -6.64825900 | -2.78984500 | 0.12097900  |
| C | -7.28289500 | -1.39016000 | -0.02311600 |
| C | -5.27477800 | 3.65854800  | -0.12493900 |
| C | -5.48513600 | 5.16188500  | -0.39506800 |
| C | 5.73435300  | -0.65913600 | -1.57754100 |
| C | 6.45470100  | 0.17179500  | -0.59851700 |
| C | 5.54008700  | 0.63382700  | 0.35717200  |
| C | 4.36117300  | -0.64698700 | -1.27111400 |
| C | 3.43484500  | -1.31847600 | -2.07758600 |
| C | 3.94729900  | -2.08451700 | -3.14108100 |
| C | 5.31623000  | -2.13378200 | -3.41917900 |
| C | 6.22505400  | -1.39793300 | -2.65339900 |



|   |             |             |             |
|---|-------------|-------------|-------------|
| C | 7.80290600  | 0.52335200  | -0.51152900 |
| C | 8.21333600  | 1.34668200  | 0.54103100  |
| C | 7.29285300  | 1.80829600  | 1.49108800  |
| C | 5.94253200  | 1.44890600  | 1.40563500  |
| C | -7.38260600 | -3.75169800 | -0.84407500 |
| C | -6.86619500 | -3.26559000 | 1.57775100  |
| C | -6.53128900 | 2.90089700  | -0.61791100 |
| C | -5.12376100 | 3.45689200  | 1.40407800  |
| C | 1.88382200  | 1.06194100  | 0.80490500  |
| C | 3.09845200  | 1.17960600  | 0.10224200  |
| C | 4.13478800  | 0.06802300  | 0.08509900  |
| C | 3.83348600  | -0.97980400 | 1.16116300  |
| C | 2.60525300  | -1.00445600 | 1.84151900  |
| N | 1.56531900  | -0.13477700 | 1.45628000  |
| C | 0.93921200  | 2.11877000  | 0.83770200  |
| C | 1.17215100  | 3.23045000  | 0.04301300  |
| C | 2.35403900  | 3.33743800  | -0.70188100 |
| C | 3.32317800  | 2.34288800  | -0.63406500 |
| C | 4.81137400  | -1.91278300 | 1.52471200  |
| C | 4.61434900  | -2.79997300 | 2.57679200  |
| C | 3.43208400  | -2.73820800 | 3.32469700  |
| C | 2.43750800  | -1.84486200 | 2.96618300  |
| C | 0.22757100  | -0.45547800 | 1.68955500  |
| C | -0.19536300 | -1.80740000 | 1.73000000  |
| C | -1.51568000 | -2.10515200 | 1.98574400  |
| C | -2.45531000 | -1.07127900 | 2.11799200  |
| C | -2.05169900 | 0.26215900  | 2.03006000  |
| C | -0.71458800 | 0.59413100  | 1.83734800  |
| C | -0.19270500 | 2.02115900  | 1.85611100  |
| C | 0.44018800  | 2.27119900  | 3.26773100  |
| C | -1.30150400 | 3.06395200  | 1.64901700  |
| H | 1.50826700  | -3.19316900 | -1.32173600 |
| H | 2.05891700  | 0.93440200  | -2.52566700 |
| H | -5.00061100 | -0.71430100 | -0.72277000 |
| H | -4.89471100 | -4.90985100 | 0.18780000  |
| H | -2.46993000 | -4.93537800 | -0.35011400 |
| H | -1.10560600 | 3.99980600  | -2.38598100 |
| H | -3.22243900 | 4.99141600  | -1.54651600 |
| H | -4.46607200 | 1.09202000  | -0.24646900 |
| H | -6.81179600 | -0.66547100 | 0.65050200  |
| H | -7.19645700 | -1.01544300 | -1.04796300 |
| H | -8.34716400 | -1.44323300 | 0.22925500  |
| H | -5.57309800 | 5.36074300  | -1.46825300 |
| H | -4.65893300 | 5.75971000  | 0.00316700  |
| H | -6.40692900 | 5.49817100  | 0.09121600  |
| H | 3.24312700  | -2.61439600 | -3.77533400 |
| H | 5.67053000  | -2.72660200 | -4.25665400 |
| H | 7.28604700  | -1.40475900 | -2.88311600 |
| H | 8.51541600  | 0.16915100  | -1.25028500 |

|   |             |             |             |
|---|-------------|-------------|-------------|
| H | 9.25642700  | 1.63539600  | 0.62248700  |
| H | 7.62987000  | 2.45036500  | 2.29842200  |
| H | 5.22199700  | 1.80214800  | 2.13744500  |
| H | -7.00937400 | -4.77528400 | -0.74581600 |
| H | -7.23425200 | -3.43502900 | -1.88153800 |
| H | -8.45798500 | -3.75777100 | -0.63035800 |
| H | -6.47618300 | -4.27576100 | 1.73218900  |
| H | -6.35862300 | -2.59395800 | 2.27877900  |
| H | -7.93555000 | -3.27328800 | 1.81941200  |
| H | -6.47469400 | 1.83076900  | -0.39561600 |
| H | -6.64355100 | 3.01519800  | -1.70092500 |
| H | -7.42812000 | 3.29936700  | -0.12949000 |
| H | -5.01624200 | 2.39490000  | 1.64897500  |
| H | -4.23491100 | 3.98395000  | 1.76870200  |
| H | -6.00244600 | 3.84426900  | 1.93344800  |
| H | 0.43230300  | 4.01905400  | -0.00678900 |
| H | 2.51770300  | 4.20926700  | -1.32608900 |
| H | 4.24909600  | 2.43226800  | -1.19322000 |
| H | 5.74736000  | -1.92390000 | 0.97736400  |
| H | 5.39085600  | -3.51128000 | 2.83668500  |
| H | 3.29214800  | -3.37747900 | 4.18946300  |
| H | 1.53418800  | -1.77461100 | 3.55751600  |
| H | 0.50316300  | -2.59663100 | 1.48579300  |
| H | -1.84724700 | -3.13562200 | 1.98024300  |
| H | -3.50680300 | -1.31581300 | 2.21845900  |
| H | -2.79824800 | 1.04572100  | 2.07085500  |
| H | 1.23861900  | 1.55808900  | 3.49132800  |
| H | 0.85615400  | 3.28268900  | 3.30351800  |
| H | -0.33649300 | 2.17521600  | 4.03240400  |
| H | -1.81540300 | 2.91636200  | 0.70206300  |
| H | -0.88289500 | 4.07275000  | 1.68247300  |
| H | -2.03167800 | 2.99542700  | 2.45969000  |

QAC-BO (gas), T<sub>1</sub>

|   |             |             |             |
|---|-------------|-------------|-------------|
| C | -0.81266800 | -0.69987100 | -1.52595100 |
| C | -0.25087400 | -1.97140900 | -1.32822800 |
| C | 1.12646300  | -2.23407400 | -1.46872600 |
| C | 1.98677200  | -1.21035200 | -1.89309800 |
| C | 1.44067000  | 0.05359800  | -2.18703100 |
| C | 0.07147600  | 0.29343000  | -1.97634900 |
| B | -2.25009800 | -0.40273600 | -1.23063800 |
| C | -3.06881200 | -1.63475700 | -0.85739700 |
| C | -2.37736400 | -2.87189900 | -0.73776200 |
| O | -1.02466100 | -2.99649200 | -0.93335000 |
| O | -0.36681300 | 1.53378900  | -2.24031600 |
| C | -1.59883500 | 1.96725400  | -1.82567600 |
| C | -2.57777400 | 1.08972500  | -1.27335100 |
| C | -4.45761900 | -1.68483400 | -0.58476300 |
| C | -5.12741900 | -2.84267200 | -0.18238800 |

|   |             |             |             |
|---|-------------|-------------|-------------|
| C | -4.37836300 | -4.03369500 | -0.06505300 |
| C | -3.01394100 | -4.04929800 | -0.35119900 |
| C | -1.81485800 | 3.33273300  | -1.97537900 |
| C | -3.00416000 | 3.90488600  | -1.50652300 |
| C | -3.96366200 | 3.11006600  | -0.85715500 |
| C | -3.72890200 | 1.72903500  | -0.76826600 |
| C | -6.63319500 | -2.86221800 | 0.12964500  |
| C | -7.29049500 | -1.47635700 | -0.03885900 |
| C | -5.21276900 | 3.69692100  | -0.18058800 |
| C | -5.37259900 | 5.20765000  | -0.44414300 |
| C | 5.74068600  | -0.74492100 | -1.54101800 |
| C | 6.44541600  | 0.10358100  | -0.56499500 |
| C | 5.51123800  | 0.58701200  | 0.36110700  |
| C | 4.36499100  | -0.72668500 | -1.24820800 |
| C | 3.45259100  | -1.39544300 | -2.06843200 |
| C | 3.96430900  | -2.16238200 | -3.13014300 |
| C | 5.33712100  | -2.22083300 | -3.38894200 |
| C | 6.23846900  | -1.49042100 | -2.60944200 |
| C | 7.79297600  | 0.45394500  | -0.46258900 |
| C | 8.18513500  | 1.30073800  | 0.57781000  |
| C | 7.24612800  | 1.78499600  | 1.49890800  |
| C | 5.89736800  | 1.42565600  | 1.39727600  |
| C | -7.34274700 | -3.85108400 | -0.82750300 |
| C | -6.84890200 | -3.32133400 | 1.59252500  |
| C | -6.48723100 | 2.98116500  | -0.68996300 |
| C | -5.07680700 | 3.48104500  | 1.34840200  |
| C | 1.86033900  | 1.05751800  | 0.73473700  |
| C | 3.07316500  | 1.13343500  | 0.02388200  |
| C | 4.11061400  | 0.01816700  | 0.08090100  |
| C | 3.77248500  | -0.99387700 | 1.19028000  |
| C | 2.53724300  | -0.97520700 | 1.85596400  |
| N | 1.51604700  | -0.09244300 | 1.44490900  |
| C | 0.96284300  | 2.15637700  | 0.74901800  |
| C | 1.21473400  | 3.23150400  | -0.09173500 |
| C | 2.39072400  | 3.28895900  | -0.85408900 |
| C | 3.33037800  | 2.27339700  | -0.74940600 |
| C | 4.74326700  | -1.92178700 | 1.59404700  |
| C | 4.53045100  | -2.78473900 | 2.66136400  |
| C | 3.33451700  | -2.69399200 | 3.38100200  |
| C | 2.35423000  | -1.79397500 | 2.98991200  |
| C | 0.14600400  | -0.34499800 | 1.70970700  |
| C | -0.35253200 | -1.65752500 | 1.77458800  |
| C | -1.69355700 | -1.88059800 | 2.04975400  |
| C | -2.57268900 | -0.80164400 | 2.19041100  |
| C | -2.09132700 | 0.49655600  | 2.06772800  |
| C | -0.73065400 | 0.74502500  | 1.85082600  |
| C | -0.12831400 | 2.14477300  | 1.82117400  |
| C | 0.57555000  | 2.39065600  | 3.19355800  |
| C | -1.18557800 | 3.24123400  | 1.62334900  |

|   |             |             |             |
|---|-------------|-------------|-------------|
| H | 1.50483100  | -3.22498900 | -1.23794200 |
| H | 2.05929800  | 0.85582600  | -2.56822500 |
| H | -5.01059200 | -0.76486900 | -0.70985100 |
| H | -4.85894500 | -4.95607400 | 0.24159200  |
| H | -2.42689800 | -4.95808300 | -0.26721200 |
| H | -1.03681000 | 3.93540100  | -2.43234500 |
| H | -3.14614600 | 4.97125100  | -1.62368500 |
| H | -4.45273800 | 1.10917400  | -0.25258500 |
| H | -6.83977700 | -0.73539700 | 0.63050100  |
| H | -7.20299000 | -1.11431600 | -1.06818300 |
| H | -8.35551800 | -1.54643900 | 0.20496400  |
| H | -5.45462900 | 5.41657900  | -1.51594700 |
| H | -4.52866400 | 5.77620100  | -0.04048800 |
| H | -6.28369800 | 5.56973100  | 0.04307500  |
| H | 3.26599600  | -2.68772800 | -3.77490800 |
| H | 5.69970600  | -2.81657300 | -4.22064100 |
| H | 7.30220200  | -1.50427300 | -2.82648000 |
| H | 8.51883400  | 0.08043900  | -1.17872200 |
| H | 9.22707800  | 1.58937000  | 0.67336700  |
| H | 7.56936500  | 2.44446100  | 2.29800000  |
| H | 5.16289500  | 1.79292400  | 2.10793800  |
| H | -6.95776900 | -4.86811300 | -0.71045900 |
| H | -7.19281700 | -3.54816500 | -1.86886200 |
| H | -8.41897400 | -3.86856900 | -0.62054600 |
| H | -6.44918800 | -4.32499500 | 1.76261100  |
| H | -6.35214700 | -2.63493900 | 2.28635800  |
| H | -7.91925200 | -3.33778100 | 1.82775500  |
| H | -6.46739400 | 1.90913600  | -0.47273900 |
| H | -6.58860600 | 3.10630700  | -1.77291600 |
| H | -7.37371800 | 3.40600900  | -0.20555700 |
| H | -5.01649400 | 2.41566800  | 1.59226900  |
| H | -4.16918000 | 3.96828700  | 1.72135800  |
| H | -5.94214200 | 3.90459200  | 1.87125600  |
| H | 0.50338600  | 4.04709200  | -0.14280300 |
| H | 2.57947700  | 4.14309600  | -1.49558100 |
| H | 4.26778000  | 2.32628500  | -1.29538700 |
| H | 5.68749600  | -1.95025300 | 1.06049000  |
| H | 5.29640500  | -3.49703400 | 2.94808600  |
| H | 3.16743700  | -3.31781200 | 4.25304100  |
| H | 1.43742700  | -1.71584900 | 3.55962000  |
| H | 0.31068000  | -2.49318800 | 1.58700500  |
| H | -2.07154700 | -2.89571400 | 2.09012500  |
| H | -3.63172300 | -0.98266900 | 2.33827600  |
| H | -2.78407500 | 1.32822700  | 2.12333300  |
| H | 1.33711800  | 1.63069700  | 3.39130800  |
| H | 1.05422600  | 3.37552500  | 3.19191200  |
| H | -0.16870700 | 2.35394600  | 3.99558500  |
| H | -1.74785300 | 3.09354700  | 0.70188700  |
| H | -0.71156300 | 4.22622700  | 1.60223800  |

|                                |             |             |             |
|--------------------------------|-------------|-------------|-------------|
| H                              | -1.88337900 | 3.24129100  | 2.46511700  |
| DQAC-DBO (gas), S <sub>0</sub> |             |             |             |
| C                              | 5.86615000  | 0.51317200  | -1.18833700 |
| C                              | 6.27249400  | 0.41023600  | 0.22478500  |
| C                              | 5.12647300  | 0.19873100  | 1.00749800  |
| C                              | 3.86900800  | 0.10350000  | 0.13174100  |
| C                              | 4.47407900  | 0.35641800  | -1.26419800 |
| C                              | 3.80120300  | 0.48456000  | -2.48070500 |
| C                              | 4.55704400  | 0.74769000  | -3.63138300 |
| C                              | 5.95041800  | 0.87213600  | -3.56100200 |
| C                              | 6.61796500  | 0.76280200  | -2.33811000 |
| C                              | 7.53055800  | 0.50499900  | 0.82204500  |
| C                              | 7.62124300  | 0.38630600  | 2.21182500  |
| C                              | 6.47371700  | 0.17734800  | 2.98894700  |
| C                              | 5.21370000  | 0.08005600  | 2.38730900  |
| C                              | 2.84381400  | 1.16727300  | 0.48912800  |
| C                              | 1.58917200  | 0.85779400  | 1.03628100  |
| N                              | 1.18198100  | -0.48410200 | 1.26973100  |
| C                              | 2.00459400  | -1.53959500 | 0.79369500  |
| C                              | 3.26916100  | -1.29370300 | 0.23158700  |
| C                              | 3.18233300  | 2.49824100  | 0.21576400  |
| C                              | 2.27291600  | 3.52398200  | 0.40186800  |
| C                              | 1.03607600  | 3.22572300  | 0.97457600  |
| C                              | 0.71142000  | 1.92805000  | 1.35831200  |
| C                              | 1.54135700  | -2.87982400 | 0.85186400  |
| C                              | 2.29103300  | -3.89329700 | 0.25973600  |
| C                              | 3.53523700  | -3.64071800 | -0.31761000 |
| C                              | 4.02696100  | -2.34793300 | -0.29117800 |
| C                              | -0.19436700 | -0.74297200 | 1.51484800  |
| C                              | -1.07752200 | 0.31451700  | 1.82544600  |
| C                              | -2.44825200 | 0.06514000  | 1.90953900  |
| C                              | -2.95549400 | -1.21791000 | 1.74892300  |
| C                              | -2.06915900 | -2.27925300 | 1.60175200  |
| C                              | -0.69020900 | -2.06525400 | 1.52998500  |
| C                              | -0.47567200 | 1.63869500  | 2.26276600  |
| C                              | 0.31110200  | -3.19945600 | 1.68903800  |
| C                              | 0.76187100  | -3.19604200 | 3.18365400  |
| C                              | 0.08760200  | 1.43176200  | 3.70517400  |
| C                              | 2.30853000  | 0.42253600  | -2.47135100 |
| C                              | 1.59890900  | 1.63022500  | -2.42445800 |
| C                              | 0.25087300  | 1.59266200  | -2.09190500 |
| C                              | -0.43087000 | 0.37785500  | -1.89035100 |
| C                              | 0.30056700  | -0.81230600 | -2.04674000 |
| C                              | 1.66513700  | -0.80980200 | -2.31815200 |
| B                              | -1.87563400 | 0.34994400  | -1.47262900 |
| C                              | -2.44861600 | 1.73627000  | -1.13882300 |
| C                              | -2.49227600 | -1.05196800 | -1.45787200 |
| C                              | -1.63114000 | 2.85713500  | -1.40781200 |

|   |             |             |             |
|---|-------------|-------------|-------------|
| C | -2.06654100 | 4.15805100  | -1.12845400 |
| C | -3.31211500 | 4.36033000  | -0.54656300 |
| C | -4.14844100 | 3.27698400  | -0.21093900 |
| C | -3.68894100 | 1.99945700  | -0.52313300 |
| C | -3.84938000 | -1.36732400 | -1.21054900 |
| C | -4.33008200 | -2.66353700 | -1.09867200 |
| C | -3.41105700 | -3.71418100 | -1.32535200 |
| C | -2.08269100 | -3.46390900 | -1.61486100 |
| C | -1.62171400 | -2.13952100 | -1.65613700 |
| C | -0.29177000 | -4.58138800 | 1.38288700  |
| C | -1.49871300 | 2.78563500  | 2.32878400  |
| O | -0.38306500 | 2.77619600  | -1.93489800 |
| O | -0.29010100 | -2.01541500 | -1.88068800 |
| C | -5.77746100 | -2.98559000 | -0.69722100 |
| C | -5.49906400 | 3.43917300  | 0.50709000  |
| C | -6.47403500 | -3.78089500 | -1.82607800 |
| C | -6.59975400 | -1.70986600 | -0.41839600 |
| C | -5.75956100 | -3.83722800 | 0.59689200  |
| C | -6.62326400 | 2.79970100  | -0.34332300 |
| C | -5.85535000 | 4.91867100  | 0.75193800  |
| C | -5.42938700 | 2.72033100  | 1.87712600  |
| H | 4.04652800  | 0.85752500  | -4.58327100 |
| H | 6.51426700  | 1.06930600  | -4.46732900 |
| H | 7.69571600  | 0.88178400  | -2.28063400 |
| H | 8.41912800  | 0.66939200  | 0.21969000  |
| H | 8.59005300  | 0.45792500  | 2.69599400  |
| H | 6.56493800  | 0.09016100  | 4.06698500  |
| H | 4.31823500  | -0.08399700 | 2.97979400  |
| H | 4.16342000  | 2.70217900  | -0.20175000 |
| H | 2.52410000  | 4.54428000  | 0.13287600  |
| H | 0.32740000  | 4.02439800  | 1.15271800  |
| H | 1.91640800  | -4.90790100 | 0.27118900  |
| H | 4.11436700  | -4.44665500 | -0.75535300 |
| H | 5.00240200  | -2.12399200 | -0.71024200 |
| H | -3.12342900 | 0.88788400  | 2.10196100  |
| H | -4.02586300 | -1.39442900 | 1.76592700  |
| H | -2.46187800 | -3.28517100 | 1.52640300  |
| H | 1.19833100  | -2.23000500 | 3.45402400  |
| H | 1.51337700  | -3.97607600 | 3.34633000  |
| H | -0.10159400 | -3.38099900 | 3.83134300  |
| H | 0.57130700  | 2.35258100  | 4.04806300  |
| H | 0.82329900  | 0.62305500  | 3.72827600  |
| H | -0.73108600 | 1.17631900  | 4.38622100  |
| H | 2.10911700  | 2.58156900  | -2.50635500 |
| H | 2.21474500  | -1.74380900 | -2.32872300 |
| H | -1.40917100 | 4.98823500  | -1.36356500 |
| H | -3.61812800 | 5.37765700  | -0.33320000 |
| H | -4.29490000 | 1.14956500  | -0.23648400 |
| H | -4.53124500 | -0.54003800 | -1.08403000 |

|   |             |             |             |
|---|-------------|-------------|-------------|
| H | -3.74508200 | -4.74603100 | -1.27539800 |
| H | -1.37771200 | -4.26562300 | -1.80525800 |
| H | 0.43903600  | -5.36919400 | 1.57889900  |
| H | -1.14419600 | -4.77329300 | 2.03823900  |
| H | -0.62291000 | -4.64773700 | 0.34407000  |
| H | -1.02308400 | 3.69225500  | 2.71096600  |
| H | -1.94282600 | 2.99948700  | 1.35657400  |
| H | -2.29515200 | 2.53221800  | 3.03285300  |
| H | -5.94797900 | -4.71693200 | -2.03719400 |
| H | -7.50243800 | -4.02745500 | -1.53834700 |
| H | -6.50163800 | -3.19104600 | -2.74803500 |
| H | -6.67725800 | -1.07877800 | -1.30992100 |
| H | -7.61404800 | -1.98714100 | -0.11417100 |
| H | -6.15563000 | -1.11712000 | 0.39019000  |
| H | -5.25450900 | -4.79489600 | 0.44076400  |
| H | -5.23848300 | -3.30695700 | 1.40157200  |
| H | -6.78341000 | -4.04708400 | 0.92621700  |
| H | -6.44794400 | 1.73020000  | -0.50055700 |
| H | -6.68544900 | 3.28233300  | -1.32409000 |
| H | -7.58883400 | 2.91184300  | 0.16280800  |
| H | -5.92397900 | 5.47303200  | -0.18994700 |
| H | -5.11436800 | 5.40765000  | 1.39303400  |
| H | -6.82669300 | 4.98340600  | 1.25249300  |
| H | -5.27131400 | 1.64444200  | 1.75114600  |
| H | -4.60664700 | 3.12023500  | 2.47948400  |
| H | -6.36656400 | 2.86014500  | 2.42763100  |

DQAC-DBO (gas), S<sub>1</sub>

|   |             |             |             |
|---|-------------|-------------|-------------|
| C | -5.86581700 | -0.65259700 | -1.03516400 |
| C | -6.19386300 | -0.35274000 | 0.36995600  |
| C | -5.00804700 | -0.05471600 | 1.05747200  |
| C | -3.79945000 | -0.08749200 | 0.10145200  |
| C | -4.48271600 | -0.50922600 | -1.22024300 |
| C | -3.86494600 | -0.85904200 | -2.42761100 |
| C | -4.69035500 | -1.33338900 | -3.45916200 |
| C | -6.07656400 | -1.44107800 | -3.29049100 |
| C | -6.68000800 | -1.10541100 | -2.07567300 |
| C | -7.41485000 | -0.35564200 | 1.04639400  |
| C | -7.42610700 | -0.05723500 | 2.41233500  |
| C | -6.23721800 | 0.23751100  | 3.09214600  |
| C | -5.01338800 | 0.24273600  | 2.41223000  |
| C | -2.78588800 | -1.11691000 | 0.54788900  |
| C | -1.50779800 | -0.77389300 | 1.03542500  |
| N | -1.08274000 | 0.57779000  | 1.10793900  |
| C | -1.93336100 | 1.60160200  | 0.61286400  |
| C | -3.19514000 | 1.30002200  | 0.05773200  |
| C | -3.14810900 | -2.45951300 | 0.43346600  |
| C | -2.24082800 | -3.46853200 | 0.70497700  |
| C | -0.98226000 | -3.13847600 | 1.21005000  |

|   |             |             |             |
|---|-------------|-------------|-------------|
| C | -0.62942200 | -1.81844400 | 1.44591100  |
| C | -1.49865700 | 2.95685300  | 0.63250400  |
| C | -2.26330800 | 3.92454100  | -0.00342700 |
| C | -3.48905000 | 3.61031000  | -0.59547400 |
| C | -3.96203400 | 2.31270800  | -0.52218200 |
| C | 0.24983400  | 0.87417100  | 1.42463200  |
| C | 1.15251100  | -0.16428500 | 1.80428400  |
| C | 2.50587700  | 0.11523900  | 1.89169200  |
| C | 2.98075300  | 1.41249700  | 1.69996300  |
| C | 2.08236600  | 2.46348400  | 1.52973900  |
| C | 0.72093800  | 2.22066900  | 1.40811700  |
| C | 0.57807700  | -1.47432200 | 2.28943200  |
| C | -0.29854200 | 3.33730500  | 1.47698700  |
| C | -0.80114700 | 3.38136000  | 2.96219800  |
| C | 0.03031600  | -1.19253900 | 3.73480900  |
| C | -2.38025200 | -0.78870000 | -2.51087000 |
| C | -1.62133600 | -1.96141800 | -2.35653200 |
| C | -0.27081700 | -1.85313600 | -2.04243200 |
| C | 0.38108700  | -0.61030300 | -1.91793700 |
| C | -0.40082000 | 0.53341200  | -2.16458100 |
| C | -1.75513400 | 0.46820800  | -2.45268000 |
| B | 1.82694500  | -0.50112300 | -1.50121700 |
| C | 2.44690200  | -1.83401400 | -1.07835200 |
| C | 2.37163400  | 0.92578800  | -1.51083800 |
| C | 1.66607300  | -3.01241300 | -1.25582500 |
| C | 2.13762300  | -4.26675200 | -0.88805100 |
| C | 3.40970300  | -4.40652000 | -0.30441400 |
| C | 4.20931500  | -3.28134500 | -0.07202000 |
| C | 3.70682400  | -2.03208800 | -0.46604400 |
| C | 3.70737900  | 1.33634500  | -1.25134700 |
| C | 4.11657700  | 2.67053400  | -1.17730300 |
| C | 3.16020700  | 3.66770100  | -1.44685300 |
| C | 1.84776600  | 3.31717000  | -1.77882400 |
| C | 1.46168200  | 1.97913200  | -1.78348100 |
| C | 0.28593000  | 4.72003400  | 1.14144500  |
| C | 1.60848700  | -2.60969800 | 2.39807500  |
| O | 0.40631300  | -3.00940100 | -1.79759400 |
| O | 0.13609800  | 1.77834700  | -2.05311900 |
| C | 5.55531500  | 3.07638200  | -0.81246300 |
| C | 5.58575400  | -3.34954600 | 0.61278700  |
| C | 6.20223900  | 3.81608300  | -2.00839000 |
| C | 6.44160300  | 1.86254000  | -0.46205300 |
| C | 5.53248100  | 4.02338600  | 0.41335200  |
| C | 6.67181400  | -2.79554700 | -0.34045800 |
| C | 5.97514400  | -4.78815800 | 1.00672300  |
| C | 5.55902000  | -2.48842100 | 1.90025400  |
| H | -4.23121000 | -1.61799200 | -4.40083000 |
| H | -6.68672300 | -1.80415400 | -4.11170300 |
| H | -7.75056600 | -1.21722500 | -1.93422300 |



|   |             |             |             |
|---|-------------|-------------|-------------|
| H | -8.33656900 | -0.58767200 | 0.52142300  |
| H | -8.36646000 | -0.05552300 | 2.95428400  |
| H | -6.26634600 | 0.46316100  | 4.15322500  |
| H | -4.08597900 | 0.47282500  | 2.92934700  |
| H | -4.13676000 | -2.69453900 | 0.05522900  |
| H | -2.50580300 | -4.50662100 | 0.53618400  |
| H | -0.27438300 | -3.92544200 | 1.43038800  |
| H | -1.91428300 | 4.94730200  | -0.02929000 |
| H | -4.07119000 | 4.38174200  | -1.08817400 |
| H | -4.92604500 | 2.05010300  | -0.94385300 |
| H | 3.20640600  | -0.68282300 | 2.09287800  |
| H | 4.04635400  | 1.60804800  | 1.71960400  |
| H | 2.46469500  | 3.47024200  | 1.44097800  |
| H | -1.23186500 | 2.42074500  | 3.26030700  |
| H | -1.56785800 | 4.15563700  | 3.06479100  |
| H | 0.03884900  | 3.60906000  | 3.62545800  |
| H | -0.43759200 | -2.10068500 | 4.12683100  |
| H | -0.71310000 | -0.38956100 | 3.73059800  |
| H | 0.85982200  | -0.89939000 | 4.38549200  |
| H | -2.09469100 | -2.93671900 | -2.35558800 |
| H | -2.31722800 | 1.38530100  | -2.57777900 |
| H | 1.50573600  | -5.13083400 | -1.06614000 |
| H | 3.74472000  | -5.39995100 | -0.03391300 |
| H | 4.30518600  | -1.15291300 | -0.26257800 |
| H | 4.43494100  | 0.55499700  | -1.09272300 |
| H | 3.43538300  | 4.71702100  | -1.42900800 |
| H | 1.10612200  | 4.06772700  | -2.03302000 |
| H | -0.47156000 | 5.49562400  | 1.27042500  |
| H | 1.09493300  | 4.96259900  | 1.83325800  |
| H | 0.67245700  | 4.74802800  | 0.12128600  |
| H | 1.14743100  | -3.49149000 | 2.84824000  |
| H | 2.01949300  | -2.87321400 | 1.42548700  |
| H | 2.42183200  | -2.31560900 | 3.06465300  |
| H | 5.63730400  | 4.71609200  | -2.26862100 |
| H | 7.22922400  | 4.11322300  | -1.76469100 |
| H | 6.22564100  | 3.16484700  | -2.88797900 |
| H | 6.54301100  | 1.18368000  | -1.31446000 |
| H | 7.44308500  | 2.20670700  | -0.18342900 |
| H | 6.03253600  | 1.29334400  | 0.38078700  |
| H | 4.96849700  | 4.93652700  | 0.20346300  |
| H | 5.07128400  | 3.53250200  | 1.27739100  |
| H | 6.55320200  | 4.31226100  | 0.68955200  |
| H | 6.46818300  | -1.75535900 | -0.61305800 |
| H | 6.70597100  | -3.38571700 | -1.26191600 |
| H | 7.65699300  | -2.83711600 | 0.13920000  |
| H | 6.03119600  | -5.43744200 | 0.12711300  |
| H | 5.25372700  | -5.21708000 | 1.71022000  |
| H | 6.95872900  | -4.78542900 | 1.48818100  |
| H | 5.38546300  | -1.43327400 | 1.66540000  |

|   |            |             |            |
|---|------------|-------------|------------|
| H | 4.76281300 | -2.83043300 | 2.57100900 |
| H | 6.51618500 | -2.56073600 | 2.42981300 |

DQAC-DBO (gas), T<sub>1</sub>

|   |             |             |             |
|---|-------------|-------------|-------------|
| C | -5.85619300 | -0.72962100 | -0.90855900 |
| C | -6.13088900 | -0.31177000 | 0.47798000  |
| C | -4.91683800 | 0.02333800  | 1.09550500  |
| C | -3.74425500 | -0.09898400 | 0.10712400  |
| C | -4.47986800 | -0.61304400 | -1.15263500 |
| C | -3.91295300 | -1.08146100 | -2.34670000 |
| C | -4.77317300 | -1.64337700 | -3.30148800 |
| C | -6.15313400 | -1.72142000 | -3.07428900 |
| C | -6.70894300 | -1.26859700 | -1.87502600 |
| C | -7.32714100 | -0.24573400 | 1.19412200  |
| C | -7.28551200 | 0.15988200  | 2.53152100  |
| C | -6.06896800 | 0.49221500  | 3.14251500  |
| C | -4.87073700 | 0.42809200  | 2.42174700  |
| C | -2.71512100 | -1.10743100 | 0.58399400  |
| C | -1.44304700 | -0.73635400 | 1.05406300  |
| N | -1.03633300 | 0.62536500  | 1.10317800  |
| C | -1.87243800 | 1.60843800  | 0.52024800  |
| C | -3.11602000 | 1.27429500  | -0.05458300 |
| C | -3.05881200 | -2.45958600 | 0.50252600  |
| C | -2.13423700 | -3.45095400 | 0.77967200  |
| C | -0.87745200 | -3.08894800 | 1.26604900  |
| C | -0.54864800 | -1.75731600 | 1.48071700  |
| C | -1.44206200 | 2.96517900  | 0.47836700  |
| C | -2.16957500 | 3.88728000  | -0.25958100 |
| C | -3.37331800 | 3.53634400  | -0.88245300 |
| C | -3.85872100 | 2.25241200  | -0.72937300 |
| C | 0.30615900  | 0.94409500  | 1.39468500  |
| C | 1.22112400  | -0.07108800 | 1.78830500  |
| C | 2.57181400  | 0.23465200  | 1.89367600  |
| C | 3.02722900  | 1.54009500  | 1.71513800  |
| C | 2.11070200  | 2.56647800  | 1.51188700  |
| C | 0.75339900  | 2.29147800  | 1.35913300  |
| C | 0.65684600  | -1.37469600 | 2.31484400  |
| C | -0.29573300 | 3.38806600  | 1.38144700  |
| C | -0.86545900 | 3.44062100  | 2.83833000  |
| C | 0.11201600  | -1.05826500 | 3.75123200  |
| C | -2.43202100 | -1.01878300 | -2.48065700 |
| C | -1.64241100 | -2.16165400 | -2.28929700 |
| C | -0.28374800 | -2.01028000 | -1.98634300 |
| C | 0.33981400  | -0.75292200 | -1.90846200 |
| C | -0.46997500 | 0.35349100  | -2.20817300 |
| C | -1.82608500 | 0.25097400  | -2.49059900 |
| B | 1.77878000  | -0.58617200 | -1.48872600 |
| C | 2.44298200  | -1.89412100 | -1.05085800 |
| C | 2.26695900  | 0.85735100  | -1.51799900 |

|   |             |             |             |
|---|-------------|-------------|-------------|
| C | 1.68457800  | -3.09267100 | -1.17747300 |
| C | 2.18363000  | -4.32449400 | -0.77225200 |
| C | 3.46341700  | -4.41675100 | -0.20414600 |
| C | 4.24869600  | -3.26989000 | -0.03016800 |
| C | 3.71732700  | -2.04522700 | -0.46242400 |
| C | 3.57192200  | 1.33631900  | -1.25259600 |
| C | 3.92003500  | 2.69711900  | -1.22331500 |
| C | 2.92587800  | 3.65197200  | -1.52051800 |
| C | 1.63526000  | 3.23688200  | -1.84686300 |
| C | 1.31650500  | 1.87534300  | -1.83706500 |
| C | 0.26824500  | 4.78205700  | 1.05799600  |
| C | 1.69488900  | -2.50050200 | 2.45595800  |
| O | 0.41217800  | -3.13413200 | -1.69201100 |
| O | 0.03143800  | 1.61077300  | -2.16623400 |
| C | 5.34335400  | 3.17059700  | -0.89098300 |
| C | 5.63638100  | -3.29125300 | 0.63375900  |
| C | 5.93893800  | 3.87969800  | -2.13337800 |
| C | 6.28173000  | 2.00824300  | -0.50457700 |
| C | 5.30370500  | 4.17315400  | 0.28985900  |
| C | 6.69804000  | -2.76665500 | -0.36252400 |
| C | 6.05064900  | -4.70667500 | 1.08271600  |
| C | 5.61868200  | -2.37574000 | 1.88348700  |
| H | -4.35012300 | -2.01743800 | -4.22880800 |
| H | -6.79503100 | -2.15350300 | -3.83569200 |
| H | -7.77419000 | -1.35883200 | -1.68571000 |
| H | -8.26987700 | -0.50651200 | 0.72250400  |
| H | -8.20526200 | 0.21691400  | 3.10495600  |
| H | -6.05755400 | 0.80186000  | 4.18263900  |
| H | -3.92166100 | 0.68739700  | 2.88318000  |
| H | -4.04791100 | -2.71878700 | 0.14146600  |
| H | -2.38626800 | -4.49633500 | 0.63727300  |
| H | -0.15661400 | -3.86070100 | 1.49950200  |
| H | -1.81932400 | 4.90834700  | -0.33189400 |
| H | -3.93320000 | 4.27521700  | -1.44581500 |
| H | -4.81366600 | 1.96589200  | -1.15735200 |
| H | 3.28004100  | -0.55038100 | 2.12140700  |
| H | 4.08643400  | 1.75880700  | 1.78526300  |
| H | 2.46756200  | 3.58385500  | 1.43516000  |
| H | -1.28286000 | 2.47355100  | 3.13342100  |
| H | -1.65713500 | 4.19464800  | 2.89692700  |
| H | -0.06303900 | 3.70003500  | 3.53616900  |
| H | -0.35339500 | -1.95597200 | 4.17039900  |
| H | -0.63369800 | -0.25796200 | 3.72586800  |
| H | 0.94080500  | -0.74344700 | 4.39329800  |
| H | -2.08870300 | -3.14850000 | -2.24588500 |
| H | -2.39981700 | 1.15041800  | -2.67130000 |
| H | 1.56301900  | -5.20504500 | -0.90293700 |
| H | 3.81974100  | -5.39187200 | 0.10344200  |
| H | 4.30285300  | -1.14851600 | -0.30490600 |

|   |             |             |             |
|---|-------------|-------------|-------------|
| H | 4.33717100  | 0.60227800  | -1.05362000 |
| H | 3.15790800  | 4.71099700  | -1.52051500 |
| H | 0.85316100  | 3.94107000  | -2.11203000 |
| H | -0.51442300 | 5.53898500  | 1.14481600  |
| H | 1.03976800  | 5.04938800  | 1.78338900  |
| H | 0.70102500  | 4.81686600  | 0.05633600  |
| H | 1.24257100  | -3.36355900 | 2.95048600  |
| H | 2.09212000  | -2.80916100 | 1.49115900  |
| H | 2.51791300  | -2.17271800 | 3.09445800  |
| H | 5.34055600  | 4.74993100  | -2.41820200 |
| H | 6.95974500  | 4.21812500  | -1.92119800 |
| H | 5.96827500  | 3.19306500  | -2.98541300 |
| H | 6.40548400  | 1.30352900  | -1.33259800 |
| H | 7.26980700  | 2.40553400  | -0.25080600 |
| H | 5.90504900  | 1.45659100  | 0.36364300  |
| H | 4.69401800  | 5.04991600  | 0.05559600  |
| H | 4.89337300  | 3.70424100  | 1.18945600  |
| H | 6.31787200  | 4.51989300  | 0.51820500  |
| H | 6.47426600  | -1.74353500 | -0.67928300 |
| H | 6.72764400  | -3.39873500 | -1.25597300 |
| H | 7.69081500  | -2.77146000 | 0.10273000  |
| H | 6.10220500  | -5.39356800 | 0.23180800  |
| H | 5.34723700  | -5.11317300 | 1.81700000  |
| H | 7.04169800  | -4.66986300 | 1.54695300  |
| H | 5.42381800  | -1.33404100 | 1.60942400  |
| H | 4.84024400  | -2.70023900 | 2.58276100  |
| H | 6.58657400  | -2.41268500 | 2.39671200  |

DQAC-SBO (gas), S<sub>0</sub>

|   |             |             |             |
|---|-------------|-------------|-------------|
| C | 5.25620200  | -1.41776200 | 1.03517400  |
| C | 5.65968700  | -1.32048500 | -0.37928600 |
| C | 4.57341400  | -0.83463800 | -1.12420900 |
| C | 3.37190400  | -0.53459900 | -0.21680000 |
| C | 3.92621300  | -0.98694800 | 1.14961600  |
| C | 3.25378100  | -1.04322100 | 2.37164800  |
| C | 3.95316200  | -1.51604200 | 3.49071700  |
| C | 5.29160000  | -1.91477200 | 3.38399500  |
| C | 5.95406800  | -1.87670800 | 2.15400100  |
| C | 6.86514000  | -1.63644200 | -1.00826900 |
| C | 6.96390500  | -1.45989600 | -2.39135300 |
| C | 5.87567800  | -0.97678300 | -3.13072400 |
| C | 4.66888500  | -0.65813600 | -2.49728300 |
| C | 3.07361800  | 0.95957200  | -0.21886100 |
| C | 1.87054300  | 1.49473900  | -0.71059300 |
| N | 0.83466300  | 0.66282600  | -1.21313200 |
| C | 0.96617400  | -0.74650300 | -1.08377300 |
| C | 2.14461100  | -1.34092400 | -0.60780700 |
| C | -0.46667200 | 1.21083900  | -1.37937000 |

|   |             |             |             |
|---|-------------|-------------|-------------|
| C | 4.04716300  | 1.79944700  | 0.33424500  |
| C | 3.83357400  | 3.16026600  | 0.46003700  |
| C | 2.65024300  | 3.69839600  | -0.04453200 |
| C | 1.68995600  | 2.90149300  | -0.66323400 |
| C | -0.11983000 | -1.59156000 | -1.43956800 |
| C | -0.05794300 | -2.95154700 | -1.15145200 |
| C | 1.10583500  | -3.53307600 | -0.64648900 |
| C | 2.21041500  | -2.72856000 | -0.43161900 |
| C | -0.68194100 | 2.60258800  | -1.28648500 |
| C | -1.98994000 | 3.09398900  | -1.28722900 |
| C | -3.07946800 | 2.24795300  | -1.46102800 |
| C | -2.85019900 | 0.90212600  | -1.72165800 |
| C | -1.55638300 | 0.37757500  | -1.71829300 |
| C | -1.24469700 | -1.00119300 | -2.27459500 |
| C | 0.52236900  | 3.52299300  | -1.41561800 |
| C | 0.22245900  | 4.96873100  | -0.98256600 |
| C | 1.80175000  | -0.69133700 | 2.39900600  |
| C | 0.87403000  | -1.73758000 | 2.31036600  |
| C | -0.44939000 | -1.42641300 | 2.02652700  |
| C | -0.89276200 | -0.09560700 | 1.91679100  |
| C | 0.05747100  | 0.92319700  | 2.10113100  |
| C | 1.40300600  | 0.64784700  | 2.32375700  |
| B | -2.32323100 | 0.22814700  | 1.58148500  |
| C | -3.15429200 | -1.00007000 | 1.17999800  |
| C | -2.67123700 | 1.71584800  | 1.71348700  |
| C | -2.55174100 | -2.26852600 | 1.34054200  |
| C | -3.22242600 | -3.44260000 | 0.98095800  |
| C | -4.49118200 | -3.36864000 | 0.42043100  |
| C | -5.12009500 | -2.12927500 | 0.18771500  |
| C | -4.43187100 | -0.98299600 | 0.58379100  |
| C | -3.96197000 | 2.29222200  | 1.65734700  |
| C | -4.16904400 | 3.66009400  | 1.74191800  |
| C | -3.06704700 | 4.51696500  | 1.90725000  |
| C | -1.78673300 | 3.99715000  | 2.00318600  |
| C | -1.59617100 | 2.61027800  | 1.91078800  |
| O | -0.29999200 | 2.22320500  | 2.01544600  |
| O | -1.30027200 | -2.45722900 | 1.82970800  |
| C | -6.48555400 | -1.99666500 | -0.50833200 |
| C | -7.08298700 | -3.36519900 | -0.89218300 |
| C | -7.48204800 | -1.27897700 | 0.43314000  |
| C | -6.31250300 | -1.16417800 | -1.80275900 |
| C | -2.47830900 | -1.91256100 | -2.38818400 |
| C | 0.91241300  | 3.54640800  | -2.92668200 |
| C | -0.68368700 | -0.79586800 | -3.71840900 |
| H | 3.44100400  | -1.57357700 | 4.44631500  |
| H | 5.81355600  | -2.27072100 | 4.26664300  |
| H | 6.98454000  | -2.20776900 | 2.06722900  |
| H | 7.70718200  | -2.01326700 | -0.43523500 |
| H | 7.89215800  | -1.70054300 | -2.89984300 |

|   |             |             |             |
|---|-------------|-------------|-------------|
| H | 5.97148600  | -0.84888400 | -4.20429500 |
| H | 3.82027300  | -0.28100800 | -3.06065200 |
| H | 4.96745300  | 1.35394200  | 0.69723200  |
| H | 4.57900500  | 3.79985000  | 0.92021300  |
| H | 2.49015500  | 4.76594800  | 0.02345100  |
| H | -0.91766300 | -3.57801800 | -1.35152300 |
| H | 1.14922500  | -4.59928200 | -0.45210600 |
| H | 3.13920600  | -3.15507100 | -0.06545900 |
| H | -2.16535000 | 4.15174800  | -1.14558600 |
| H | -4.08908800 | 2.64199600  | -1.42528800 |
| H | -3.68586300 | 0.24858000  | -1.93468000 |
| H | -0.05578900 | 5.01548700  | 0.07310800  |
| H | 1.09036000  | 5.60876400  | -1.15479000 |
| H | -0.59199500 | 5.38158500  | -1.58150100 |
| H | 1.19478800  | -2.77151500 | 2.32633900  |
| H | 2.12101200  | 1.45851200  | 2.36802800  |
| H | -2.72455500 | -4.39403100 | 1.13428300  |
| H | -4.97873700 | -4.29450700 | 0.14037400  |
| H | -4.86973500 | -0.01380700 | 0.37664800  |
| H | -4.81902600 | 1.63594000  | 1.55683400  |
| H | -5.17299700 | 4.06872200  | 1.69396100  |
| H | -3.21730100 | 5.58972700  | 1.98078200  |
| H | -0.92049200 | 4.62884900  | 2.16447400  |
| H | -6.43465400 | -3.90307900 | -1.59185400 |
| H | -7.24316700 | -3.99297000 | -0.00937600 |
| H | -8.05210400 | -3.21635600 | -1.37891500 |
| H | -7.61870100 | -1.85236400 | 1.35581100  |
| H | -7.12719500 | -0.28016100 | 0.70390000  |
| H | -8.45581200 | -1.17169400 | -0.05816200 |
| H | -5.57972400 | -1.63630700 | -2.46587700 |
| H | -5.96979200 | -0.14873700 | -1.58152400 |
| H | -7.26740300 | -1.08853100 | -2.33498900 |
| H | -2.93843900 | -2.10875000 | -1.42006500 |
| H | -2.20139900 | -2.86355400 | -2.85010600 |
| H | -3.22039000 | -1.45262100 | -3.04544600 |
| H | 1.13657600  | 2.53653500  | -3.28283000 |
| H | 1.79953600  | 4.17230600  | -3.07143400 |
| H | 0.08249700  | 3.94781200  | -3.51775400 |
| H | 0.19906400  | -0.15065000 | -3.70984900 |
| H | -0.40354100 | -1.76433200 | -4.14622000 |
| H | -1.44940900 | -0.32910300 | -4.34692400 |

DQAC-SBO (gas), S<sub>1</sub>

|   |             |             |             |
|---|-------------|-------------|-------------|
| C | -5.27361100 | -1.34982700 | -1.08734000 |
| C | -5.66709300 | -1.31953800 | 0.33228100  |
| C | -4.57820400 | -0.86946000 | 1.09554400  |
| C | -3.38061300 | -0.53027400 | 0.18782800  |
| C | -3.94501000 | -0.91483100 | -1.19665200 |
| C | -3.26679600 | -0.91095200 | -2.41753400 |

|   |             |             |             |
|---|-------------|-------------|-------------|
| C | -3.98135000 | -1.33756000 | -3.54790200 |
| C | -5.31821600 | -1.74512700 | -3.45190500 |
| C | -5.97809400 | -1.76203500 | -2.21996000 |
| C | -6.86701200 | -1.66400500 | 0.95652800  |
| C | -6.95615900 | -1.55235300 | 2.34733700  |
| C | -5.86449600 | -1.10470000 | 3.10241700  |
| C | -4.66178700 | -0.75685900 | 2.47551300  |
| C | -3.08666500 | 0.95254600  | 0.27009300  |
| C | -1.86300800 | 1.47123000  | 0.74274500  |
| N | -0.80673200 | 0.60642700  | 1.14206600  |
| C | -0.97255800 | -0.79718800 | 1.03036300  |
| C | -2.17221600 | -1.36013500 | 0.54925500  |
| C | 0.46262900  | 1.13248300  | 1.40481200  |
| C | -4.08788900 | 1.81514100  | -0.17566000 |
| C | -3.89006200 | 3.18431700  | -0.20133700 |
| C | -2.68850800 | 3.70411400  | 0.27619500  |
| C | -1.68293400 | 2.88090000  | 0.77049200  |
| C | 0.09667300  | -1.66881500 | 1.38987800  |
| C | 0.00236300  | -3.01953100 | 1.09356100  |
| C | -1.17518200 | -3.56344300 | 0.57504000  |
| C | -2.26702900 | -2.74006400 | 0.36343600  |
| C | 0.69914700  | 2.53727800  | 1.33409500  |
| C | 2.00754700  | 2.99607000  | 1.33183900  |
| C | 3.07762300  | 2.11669900  | 1.48803000  |
| C | 2.83515600  | 0.77202800  | 1.76852700  |
| C | 1.54609700  | 0.27003300  | 1.75312300  |
| C | 1.22535300  | -1.12311600 | 2.23857700  |
| C | -0.47379800 | 3.48443200  | 1.45612000  |
| C | -0.14881700 | 4.90986700  | 0.97426200  |
| C | -1.81649400 | -0.56409100 | -2.43708600 |
| C | -0.88970100 | -1.61639400 | -2.34186600 |
| C | 0.43687700  | -1.32410900 | -2.05849700 |
| C | 0.90881700  | -0.00353500 | -1.92489100 |
| C | -0.04020400 | 1.02261900  | -2.09078000 |
| C | -1.38726300 | 0.76901100  | -2.32520900 |
| B | 2.35356700  | 0.29379700  | -1.60781500 |
| C | 3.15746500  | -0.94650800 | -1.21043300 |
| C | 2.71200400  | 1.77599000  | -1.66556900 |
| C | 2.54025400  | -2.21908700 | -1.38011000 |
| C | 3.18432400  | -3.40292700 | -1.04187400 |
| C | 4.47120600  | -3.37520500 | -0.47847100 |
| C | 5.10913900  | -2.15227300 | -0.23456800 |
| C | 4.44018900  | -0.97832600 | -0.61386300 |
| C | 4.00353800  | 2.35844800  | -1.54382200 |
| C | 4.21678200  | 3.73701700  | -1.55748900 |
| C | 3.14185200  | 4.61065500  | -1.74380700 |
| C | 1.85458100  | 4.07943100  | -1.92637900 |
| C | 1.65174900  | 2.70563300  | -1.86703500 |
| O | 0.33166400  | 2.32858300  | -1.96156000 |

|   |             |             |             |
|---|-------------|-------------|-------------|
| O | 1.28064100  | -2.37938100 | -1.89447200 |
| C | 6.48008600  | -2.04694300 | 0.45658300  |
| C | 7.05937100  | -3.42686100 | 0.82757400  |
| C | 7.48799600  | -1.33581300 | -0.47741800 |
| C | 6.32562400  | -1.22558500 | 1.76104700  |
| C | 2.45341200  | -2.04275900 | 2.32438600  |
| C | -0.81755500 | 3.55274800  | 2.98403900  |
| C | 0.64831400  | -0.96777000 | 3.69023200  |
| H | -3.47383900 | -1.35267100 | -4.50739400 |
| H | -5.84292800 | -2.06489900 | -4.34681200 |
| H | -7.00698500 | -2.09976000 | -2.14227900 |
| H | -7.71276000 | -2.01398700 | 0.37240500  |
| H | -7.88110400 | -1.81723200 | 2.84959800  |
| H | -5.95248400 | -1.02788500 | 4.18131100  |
| H | -3.81045300 | -0.40808500 | 3.05305500  |
| H | -5.01682100 | 1.38638200  | -0.53443500 |
| H | -4.66039500 | 3.84622600  | -0.58224400 |
| H | -2.54467600 | 4.77478800  | 0.26867600  |
| H | 0.84986100  | -3.66497200 | 1.27882300  |
| H | -1.23482600 | -4.62380600 | 0.35514900  |
| H | -3.20034700 | -3.14329900 | -0.01486300 |
| H | 2.21502200  | 4.04270700  | 1.16313500  |
| H | 4.09279500  | 2.48753800  | 1.41481000  |
| H | 3.66859800  | 0.10820000  | 1.95080800  |
| H | 0.08837300  | 4.91213900  | -0.09054000 |
| H | -0.98618400 | 5.58233900  | 1.16743500  |
| H | 0.69998700  | 5.31302700  | 1.52883800  |
| H | -1.21166200 | -2.64991700 | -2.39205500 |
| H | -2.08616400 | 1.59623600  | -2.38365500 |
| H | 2.67120100  | -4.34184200 | -1.22335500 |
| H | 4.94314300  | -4.31570100 | -0.22417400 |
| H | 4.91437100  | -0.02430300 | -0.41597600 |
| H | 4.85861300  | 1.69885400  | -1.44615800 |
| H | 5.22361000  | 4.13066200  | -1.45030200 |
| H | 3.29676900  | 5.68373500  | -1.78297200 |
| H | 1.00138800  | 4.72009100  | -2.12227700 |
| H | 6.40242300  | -3.96152900 | 1.52169700  |
| H | 7.20324000  | -4.04752500 | -0.06268500 |
| H | 8.03312200  | -3.29930200 | 1.31212600  |
| H | 7.61173800  | -1.90448500 | -1.40471900 |
| H | 7.14674900  | -0.33106900 | -0.74203900 |
| H | 8.46516300  | -1.24848000 | 0.01236100  |
| H | 5.58546600  | -1.69566300 | 2.41882100  |
| H | 5.99846800  | -0.20310000 | 1.54802600  |
| H | 7.28112400  | -1.16995200 | 2.29567200  |
| H | 2.91810200  | -2.18857000 | 1.35053300  |
| H | 2.17031700  | -3.01222200 | 2.74029800  |
| H | 3.18925500  | -1.61561400 | 3.00984600  |
| H | -1.05991000 | 2.56015600  | 3.37596000  |



|   |             |             |            |
|---|-------------|-------------|------------|
| H | -1.68075600 | 4.20873000  | 3.13384400 |
| H | 0.04147400  | 3.94745600  | 3.53516700 |
| H | -0.23376500 | -0.32083400 | 3.70481300 |
| H | 0.36575400  | -1.95294900 | 4.07370500 |
| H | 1.41373800  | -0.53136400 | 4.33910800 |

DQAC-SBO (gas), T<sub>1</sub>

|   |             |             |             |
|---|-------------|-------------|-------------|
| C | -5.28253100 | -1.36845100 | -1.05571000 |
| C | -5.66055200 | -1.31596900 | 0.36840600  |
| C | -4.55947800 | -0.85604300 | 1.10869000  |
| C | -3.37032600 | -0.54146800 | 0.19029800  |
| C | -3.95329900 | -0.93989300 | -1.17823200 |
| C | -3.30303200 | -0.93042500 | -2.41338500 |
| C | -4.02565900 | -1.34997300 | -3.53987200 |
| C | -5.36069700 | -1.75895500 | -3.42430300 |
| C | -6.00064100 | -1.77679900 | -2.18166300 |
| C | -6.85656900 | -1.64442800 | 1.00861800  |
| C | -6.93087300 | -1.50638400 | 2.39774400  |
| C | -5.82827200 | -1.04871100 | 3.13185500  |
| C | -4.63035100 | -0.71813500 | 2.48751500  |
| C | -3.04829800 | 0.94696500  | 0.22538600  |
| C | -1.84249800 | 1.45026800  | 0.74434200  |
| N | -0.82593600 | 0.58945200  | 1.23807200  |
| C | -0.96912600 | -0.81106600 | 1.05740800  |
| C | -2.14814300 | -1.37540200 | 0.54125900  |
| C | 0.48348100  | 1.11750000  | 1.43252200  |
| C | -4.00163600 | 1.81621200  | -0.32001600 |
| C | -3.76387500 | 3.17581900  | -0.41134800 |
| C | -2.57941700 | 3.68243400  | 0.12368000  |
| C | -1.64200000 | 2.85592800  | 0.73830100  |
| C | 0.10203300  | -1.68078100 | 1.39924200  |
| C | 0.02464600  | -3.03123900 | 1.07061000  |
| C | -1.13548200 | -3.58147700 | 0.52409900  |
| C | -2.22566800 | -2.75551300 | 0.31137900  |
| C | 0.71494900  | 2.50747100  | 1.37106700  |
| C | 2.02867000  | 2.98085000  | 1.37245300  |
| C | 3.10481100  | 2.11284500  | 1.52013100  |
| C | 2.85922200  | 0.76713000  | 1.76137400  |
| C | 1.55829500  | 0.26181000  | 1.75306800  |
| C | 1.22939200  | -1.13171000 | 2.25948400  |
| C | -0.47852900 | 3.43707900  | 1.52654100  |
| C | -0.15894400 | 4.89546500  | 1.15632800  |
| C | -1.85459800 | -0.57232600 | -2.44445500 |
| C | -0.90618500 | -1.60163400 | -2.32397200 |
| C | 0.44330900  | -1.29351900 | -2.03147700 |
| C | 0.92140100  | 0.02146200  | -1.90996200 |
| C | -0.04140400 | 1.02596500  | -2.08632700 |
| C | -1.41192700 | 0.75554500  | -2.32773100 |

|   |             |             |             |
|---|-------------|-------------|-------------|
| B | 2.35156200  | 0.32806200  | -1.59092000 |
| C | 3.16398500  | -0.91535300 | -1.22223300 |
| C | 2.68367700  | 1.81987800  | -1.65376200 |
| C | 2.54082900  | -2.18789900 | -1.38356400 |
| C | 3.17168100  | -3.38505800 | -1.06736700 |
| C | 4.46085500  | -3.36592700 | -0.52218400 |
| C | 5.10988100  | -2.14401300 | -0.28332300 |
| C | 4.45134300  | -0.95830500 | -0.65023700 |
| C | 3.95559400  | 2.42902100  | -1.54179400 |
| C | 4.13029100  | 3.81185700  | -1.56516100 |
| C | 3.03116200  | 4.66365400  | -1.72853400 |
| C | 1.75857700  | 4.11017600  | -1.88973900 |
| C | 1.60390200  | 2.72733300  | -1.84840600 |
| O | 0.29881000  | 2.31331600  | -1.99626200 |
| O | 1.25796300  | -2.33356700 | -1.85275300 |
| C | 6.48257300  | -2.05503200 | 0.40266200  |
| C | 7.05681600  | -3.44186300 | 0.75520200  |
| C | 7.48814800  | -1.33658000 | -0.52892900 |
| C | 6.32937700  | -1.24744000 | 1.71641200  |
| C | 2.45672000  | -2.05487000 | 2.33583400  |
| C | -0.88612600 | 3.40605900  | 3.03317200  |
| C | 0.66225000  | -0.97468100 | 3.70625500  |
| H | -3.53541500 | -1.35706600 | -4.50865600 |
| H | -5.89972000 | -2.07442800 | -4.31204900 |
| H | -7.03053000 | -2.10900600 | -2.09243400 |
| H | -7.71026500 | -2.00079700 | 0.43979400  |
| H | -7.85160400 | -1.75704900 | 2.91491100  |
| H | -5.90566500 | -0.95022700 | 4.20996400  |
| H | -3.77027500 | -0.36156500 | 3.04693100  |
| H | -4.92514500 | 1.39515300  | -0.70315700 |
| H | -4.49293800 | 3.83841700  | -0.86512700 |
| H | -2.40094700 | 4.74854300  | 0.08466700  |
| H | 0.87314400  | -3.67383600 | 1.26690000  |
| H | -1.18960800 | -4.64109100 | 0.29858500  |
| H | -3.15426000 | -3.15798900 | -0.08166200 |
| H | 2.22037600  | 4.03712600  | 1.23829600  |
| H | 4.11998100  | 2.49067200  | 1.47345300  |
| H | 3.68950900  | 0.09812900  | 1.94464900  |
| H | 0.13726400  | 4.98323900  | 0.10854200  |
| H | -1.02325700 | 5.53681700  | 1.34310600  |
| H | 0.65174100  | 5.27251000  | 1.78349400  |
| H | -1.20439300 | -2.64337000 | -2.36431700 |
| H | -2.10562400 | 1.58986800  | -2.36721700 |
| H | 2.63854300  | -4.31557400 | -1.23144600 |
| H | 4.92953700  | -4.30767200 | -0.26915700 |
| H | 4.93242000  | -0.00966700 | -0.44548200 |
| H | 4.82572800  | 1.79185000  | -1.43182700 |
| H | 5.12663600  | 4.23166200  | -1.46277000 |
| H | 3.16260100  | 5.73996400  | -1.75332000 |

|   |             |             |             |
|---|-------------|-------------|-------------|
| H | 0.88146600  | 4.72663000  | -2.05348100 |
| H | 6.40424000  | -3.97949400 | 1.45087300  |
| H | 7.19476700  | -4.05543700 | -0.14105100 |
| H | 8.03356000  | -3.32123900 | 1.23459100  |
| H | 7.60902100  | -1.89417100 | -1.46340800 |
| H | 7.15334000  | -0.32589000 | -0.77797900 |
| H | 8.46567000  | -1.26110300 | -0.03908300 |
| H | 5.58328900  | -1.71690000 | 2.36711200  |
| H | 6.01288000  | -0.21901000 | 1.51907700  |
| H | 7.28539100  | -1.21098200 | 2.25088000  |
| H | 2.91495400  | -2.20517300 | 1.35798900  |
| H | 2.17699700  | -3.02475300 | 2.75480500  |
| H | 3.20055400  | -1.62610800 | 3.01212600  |
| H | -1.12619900 | 2.38674600  | 3.34957000  |
| H | -1.76633000 | 4.03803300  | 3.19343600  |
| H | -0.05725200 | 3.77387100  | 3.64688500  |
| H | -0.21532400 | -0.32166300 | 3.71366400  |
| H | 0.37247700  | -1.95512900 | 4.09917200  |
| H | 1.42780300  | -0.53569900 | 4.35446600  |

DQAC-NBO (gas), S<sub>0</sub>

|   |             |             |             |
|---|-------------|-------------|-------------|
| C | -4.82232300 | -0.49726100 | -1.36925600 |
| C | -5.36602400 | -0.43100300 | -0.00102100 |
| C | -4.30517600 | -0.21774400 | 0.89245800  |
| C | -2.97291100 | -0.06797900 | 0.14348800  |
| C | -3.42817900 | -0.33871700 | -1.30531900 |
| C | -2.63930700 | -0.47264400 | -2.44862900 |
| C | -3.28277500 | -0.70950800 | -3.67256900 |
| C | -4.67683200 | -0.81633500 | -3.74369400 |
| C | -5.45945800 | -0.72628700 | -2.58942100 |
| C | -6.67409400 | -0.56145100 | 0.46912000  |
| C | -6.90017600 | -0.47880400 | 1.84591300  |
| C | -5.83653700 | -0.26984500 | 2.73448100  |
| C | -4.52688300 | -0.13496900 | 2.25959200  |
| C | -2.45680600 | 1.36252600  | 0.27886100  |
| C | -1.15369300 | 1.66763200  | 0.72603000  |
| N | -0.28013500 | 0.65054900  | 1.17673000  |
| C | -0.69514100 | -0.70118700 | 1.12737600  |
| C | -1.94552300 | -1.07732400 | 0.61640000  |
| C | -3.33238100 | 2.38194800  | -0.10314100 |
| C | -2.94921300 | 3.71224000  | -0.06636300 |
| C | -1.64899800 | 4.00968500  | 0.32310500  |
| C | -0.73605100 | 3.01846900  | 0.69390600  |
| C | 0.16614200  | -1.72102400 | 1.61409900  |
| C | -0.14978400 | -3.05622200 | 1.38422800  |
| C | -1.36611800 | -3.42467200 | 0.80539100  |
| C | -2.27425800 | -2.43160700 | 0.48394900  |
| C | 1.08316900  | 0.95235900  | 1.42391700  |
| C | 1.59768300  | 2.24863700  | 1.22450100  |

|   |             |             |             |
|---|-------------|-------------|-------------|
| C | 2.97411100  | 2.46219200  | 1.37858400  |
| C | 3.84175100  | 1.44058700  | 1.73161100  |
| C | 3.31352800  | 0.18758100  | 2.02649100  |
| C | 1.94497200  | -0.05618100 | 1.92689300  |
| C | 0.68577100  | 3.45833600  | 1.03283700  |
| C | 1.31150900  | -1.30451600 | 2.52194100  |
| C | 0.67197500  | 4.24517700  | 2.37447000  |
| C | 0.68420600  | -0.89339600 | 3.89260200  |
| C | -1.14958700 | -0.49863500 | -2.31355000 |
| C | -0.55315800 | -1.75455700 | -2.13442700 |
| C | 0.77942700  | -1.80623000 | -1.75276600 |
| C | 1.57112800  | -0.64830300 | -1.66096900 |
| C | 0.96131800  | 0.58171900  | -1.96264000 |
| C | -0.40219600 | 0.68222200  | -2.23973500 |
| B | 3.00753100  | -0.71996000 | -1.21625600 |
| C | 3.42988900  | -2.10521900 | -0.70057200 |
| C | 3.77641500  | 0.59430400  | -1.38772500 |
| C | 2.50537500  | -3.16229400 | -0.86444600 |
| C | 2.77611000  | -4.46610800 | -0.41868000 |
| C | 3.97906500  | -4.73360100 | 0.21555900  |
| C | 4.91361600  | -3.70480800 | 0.42637900  |
| C | 4.63104400  | -2.42370200 | -0.02370300 |
| C | 5.16964900  | 0.78004000  | -1.22757500 |
| C | 5.77857500  | 2.01342800  | -1.39324100 |
| C | 4.99848200  | 3.12268300  | -1.76090100 |
| C | 3.63468200  | 2.98441300  | -1.96005400 |
| C | 3.03109800  | 1.73228400  | -1.76593000 |
| O | 1.29128700  | -3.01969800 | -1.44908800 |
| O | 1.68530700  | 1.72390500  | -1.96079200 |
| C | 2.31525700  | -2.43552700 | 2.80086800  |
| C | 1.20450600  | 4.38555100  | -0.09811200 |
| H | -2.68088800 | -0.82409200 | -4.56890900 |
| H | -5.14961400 | -0.99485300 | -4.70429100 |
| H | -6.53758900 | -0.84604100 | -2.63767600 |
| H | -7.49697300 | -0.72738500 | -0.21990100 |
| H | -7.90927400 | -0.58001200 | 2.23274500  |
| H | -6.03213900 | -0.21274800 | 3.80058000  |
| H | -3.69614200 | 0.02852300  | 2.93977700  |
| H | -4.32866300 | 2.11043400  | -0.43550500 |
| H | -3.63967700 | 4.49968100  | -0.34792200 |
| H | -1.32992500 | 5.04481000  | 0.33458500  |
| H | 0.54814500  | -3.82830700 | 1.68194300  |
| H | -1.60621200 | -4.47037600 | 0.64678600  |
| H | -3.24859600 | -2.68289600 | 0.07483900  |
| H | 3.37623100  | 3.45447400  | 1.21751400  |
| H | 4.90859500  | 1.62277800  | 1.79484500  |
| H | 3.97163700  | -0.60586900 | 2.35633200  |
| H | 0.00277800  | 5.10868500  | 2.30540200  |
| H | 1.67933800  | 4.59958900  | 2.61533000  |

|   |             |             |             |
|---|-------------|-------------|-------------|
| H | 0.32722100  | 3.60092000  | 3.18876700  |
| H | -0.04526300 | -0.08887400 | 3.76940700  |
| H | 0.17893700  | -1.75643900 | 4.33904500  |
| H | 1.47366900  | -0.54653100 | 4.56764900  |
| H | -1.14347700 | -2.66135100 | -2.16044400 |
| H | -0.86810900 | 1.65399900  | -2.36002000 |
| H | 2.02661700  | -5.23344500 | -0.57886600 |
| H | 4.18943100  | -5.73989700 | 0.56419300  |
| H | 5.84266800  | -3.91245400 | 0.94665500  |
| H | 5.33684400  | -1.62701500 | 0.17945800  |
| H | 5.78303700  | -0.07862200 | -0.98189100 |
| H | 6.84990700  | 2.12133000  | -1.25986300 |
| H | 5.46511300  | 4.09162000  | -1.90996300 |
| H | 3.02107700  | 3.82031800  | -2.27140700 |
| H | 1.80516100  | -3.27936200 | 3.27199000  |
| H | 3.07583000  | -2.09724200 | 3.50870500  |
| H | 2.80771800  | -2.77993900 | 1.89209200  |
| H | 2.26062500  | 4.62459700  | 0.03524400  |
| H | 0.65967000  | 5.33207100  | -0.10509000 |
| H | 1.07158500  | 3.89410400  | -1.06257400 |

DQAC-NBO (gas), S<sub>1</sub>

|   |             |             |             |
|---|-------------|-------------|-------------|
| C | 4.79617300  | -0.37728900 | 1.49869400  |
| C | 5.40280700  | -0.46270700 | 0.15860600  |
| C | 4.38955800  | -0.33917200 | -0.80428000 |
| C | 3.02582300  | -0.10358700 | -0.13310400 |
| C | 3.40601800  | -0.23155500 | 1.35957200  |
| C | 2.55646700  | -0.22373900 | 2.46732000  |
| C | 3.15578900  | -0.29673500 | 3.73546400  |
| C | 4.54463200  | -0.39466000 | 3.88241000  |
| C | 5.37958500  | -0.45360700 | 2.76344700  |
| C | 6.72947400  | -0.64525400 | -0.23498000 |
| C | 7.02068200  | -0.70602100 | -1.60102300 |
| C | 6.00360800  | -0.58585900 | -2.55685400 |
| C | 4.67388500  | -0.39778100 | -2.16074100 |
| C | 2.54467500  | 1.30981700  | -0.41272600 |
| C | 1.22713400  | 1.60092400  | -0.83266400 |
| N | 0.32813000  | 0.55559800  | -1.17045700 |
| C | 0.75334300  | -0.78988000 | -1.09620100 |
| C | 2.01292500  | -1.13376300 | -0.56436900 |
| C | 3.44701200  | 2.34587700  | -0.18200100 |
| C | 3.07500400  | 3.67187300  | -0.34801000 |
| C | 1.76263400  | 3.95999700  | -0.69941600 |
| C | 0.81852900  | 2.95477400  | -0.91422800 |
| C | -0.11108500 | -1.83263200 | -1.53834800 |
| C | 0.21386700  | -3.15071200 | -1.25792400 |
| C | 1.43659700  | -3.48055800 | -0.66815200 |
| C | 2.34637700  | -2.47590700 | -0.38177400 |
| C | -1.00646500 | 0.84915800  | -1.46526500 |

|   |             |             |             |
|---|-------------|-------------|-------------|
| C | -1.52057000 | 2.16762800  | -1.31025500 |
| C | -2.89398700 | 2.36059900  | -1.40476500 |
| C | -3.76254900 | 1.30469800  | -1.65694300 |
| C | -3.24487700 | 0.03906100  | -1.94249500 |
| C | -1.88313800 | -0.19060200 | -1.90460800 |
| C | -0.61501700 | 3.37651800  | -1.18058000 |
| C | -1.27256600 | -1.46720900 | -2.43597000 |
| C | -0.68219500 | 4.14343800  | -2.53707100 |
| C | -0.65930400 | -1.12312700 | -3.83942700 |
| C | 1.07465700  | -0.27796500 | 2.28554100  |
| C | 0.49990200  | -1.54938900 | 2.11198300  |
| C | -0.84028300 | -1.64839700 | 1.76487700  |
| C | -1.67681500 | -0.52165000 | 1.65583400  |
| C | -1.07942500 | 0.72601800  | 1.90962400  |
| C | 0.27874400  | 0.87403900  | 2.18750200  |
| B | -3.13043700 | -0.65011100 | 1.26528500  |
| C | -3.51171200 | -2.05020800 | 0.78164600  |
| C | -3.91489900 | 0.65827700  | 1.35006600  |
| C | -2.55082400 | -3.09165700 | 0.94117900  |
| C | -2.77501900 | -4.40021300 | 0.52115700  |
| C | -3.98426100 | -4.73937400 | -0.10435600 |
| C | -4.94577600 | -3.74652600 | -0.31111900 |
| C | -4.70771100 | -2.44043400 | 0.11978200  |
| C | -5.30873500 | 0.84272400  | 1.14683600  |
| C | -5.92213100 | 2.09528000  | 1.19646400  |
| C | -5.16621500 | 3.23287700  | 1.48762100  |
| C | -3.79137600 | 3.09679000  | 1.73784000  |
| C | -3.19092200 | 1.84497500  | 1.65821100  |
| O | -1.32520300 | -2.89469700 | 1.52565600  |
| O | -1.82791600 | 1.86361300  | 1.84569100  |
| C | -2.28795300 | -2.60061100 | -2.64640400 |
| C | -1.08444100 | 4.31234500  | -0.03289800 |
| H | 2.51375300  | -0.29787600 | 4.61079700  |
| H | 4.97317700  | -0.45073900 | 4.87814500  |
| H | 6.45386300  | -0.56636500 | 2.87318200  |
| H | 7.51752700  | -0.74208000 | 0.50567000  |
| H | 8.04599900  | -0.85084600 | -1.92621200 |
| H | 6.24920400  | -0.64014100 | -3.61251000 |
| H | 3.87964400  | -0.30284900 | -2.89543500 |
| H | 4.45197000  | 2.09732000  | 0.13890500  |
| H | 3.78940700  | 4.47061000  | -0.18071000 |
| H | 1.45757900  | 4.99479900  | -0.79053600 |
| H | -0.49057300 | -3.93500500 | -1.50024700 |
| H | 1.67593900  | -4.51647300 | -0.45410800 |
| H | 3.31674600  | -2.70846500 | 0.04499500  |
| H | -3.30953500 | 3.34537000  | -1.24034600 |
| H | -4.83301600 | 1.46793300  | -1.62902500 |
| H | -3.91993500 | -0.77925300 | -2.15479900 |
| H | -0.03926100 | 5.02743900  | -2.50805500 |

|   |             |             |             |
|---|-------------|-------------|-------------|
| H | -1.70904200 | 4.46554200  | -2.73070700 |
| H | -0.35682100 | 3.50048400  | -3.36032600 |
| H | 0.07937400  | -0.31940400 | -3.77395300 |
| H | -0.17146000 | -2.01366200 | -4.24742300 |
| H | -1.46019600 | -0.80777300 | -4.51505400 |
| H | 1.10479900  | -2.44624500 | 2.16828600  |
| H | 0.70376800  | 1.86521700  | 2.31018900  |
| H | -1.99892700 | -5.13793400 | 0.69733500  |
| H | -4.16177900 | -5.76052800 | -0.42435100 |
| H | -5.88156000 | -3.99155000 | -0.80479600 |
| H | -5.46344800 | -1.68583300 | -0.06610800 |
| H | -5.92270700 | -0.03127200 | 0.96254100  |
| H | -6.99183400 | 2.18175600  | 1.02902600  |
| H | -5.63315700 | 4.21037000  | 1.54804500  |
| H | -3.17973500 | 3.95411700  | 1.99496200  |
| H | -1.79187800 | -3.46923600 | -3.08564700 |
| H | -3.05222000 | -2.28511400 | -3.36060500 |
| H | -2.77067500 | -2.89486000 | -1.71617900 |
| H | -2.11983100 | 4.62134100  | -0.18273300 |
| H | -0.47372000 | 5.21687600  | -0.00470000 |
| H | -1.01511700 | 3.79091600  | 0.92212900  |

DQAC-NBO (gas), T<sub>1</sub>

|   |             |             |             |
|---|-------------|-------------|-------------|
| C | 4.77283600  | -0.40169700 | 1.54102500  |
| C | 5.40800400  | -0.52883900 | 0.21739600  |
| C | 4.41771600  | -0.41342600 | -0.77006400 |
| C | 3.04554700  | -0.13218500 | -0.13762400 |
| C | 3.38842700  | -0.24306300 | 1.36387100  |
| C | 2.51290400  | -0.20721200 | 2.44971800  |
| C | 3.07734200  | -0.25356400 | 3.73542500  |
| C | 4.46125300  | -0.35800700 | 3.91857400  |
| C | 5.32265600  | -0.45377700 | 2.82179400  |
| C | 6.74035900  | -0.74135300 | -0.14057700 |
| C | 7.06087400  | -0.84134100 | -1.49760300 |
| C | 6.06682100  | -0.72968000 | -2.47859700 |
| C | 4.73196500  | -0.51012500 | -2.11778300 |
| C | 2.60891400  | 1.29495900  | -0.44235600 |
| C | 1.29103400  | 1.61804800  | -0.82908500 |
| N | 0.35678400  | 0.59076500  | -1.13645100 |
| C | 0.74922800  | -0.75981400 | -1.08134100 |
| C | 2.00690700  | -1.13991200 | -0.56792700 |
| C | 3.54647700  | 2.30881400  | -0.24319800 |
| C | 3.20376100  | 3.64320500  | -0.40020200 |
| C | 1.88800600  | 3.96164400  | -0.71103700 |
| C | 0.91350500  | 2.97929300  | -0.90255800 |
| C | -0.13866800 | -1.77874500 | -1.53397400 |
| C | 0.16863500  | -3.10906900 | -1.28898800 |
| C | 1.39277600  | -3.47675500 | -0.72217200 |
| C | 2.32008000  | -2.49498300 | -0.41929000 |

|   |             |             |             |
|---|-------------|-------------|-------------|
| C | -0.97979700 | 0.92280700  | -1.42538600 |
| C | -1.45423700 | 2.24904200  | -1.27326800 |
| C | -2.82407900 | 2.48285900  | -1.37734200 |
| C | -3.72488400 | 1.45333100  | -1.61660100 |
| C | -3.24037600 | 0.17493200  | -1.89769100 |
| C | -1.88025800 | -0.08958900 | -1.86667900 |
| C | -0.51968800 | 3.43804700  | -1.12658400 |
| C | -1.29515700 | -1.37118900 | -2.42409000 |
| C | -0.59876900 | 4.25860700  | -2.44813900 |
| C | -0.67734900 | -1.01260300 | -3.82013600 |
| C | 1.03570700  | -0.27193600 | 2.23364000  |
| C | 0.47470200  | -1.54634300 | 2.04211500  |
| C | -0.87541100 | -1.66448800 | 1.70481800  |
| C | -1.73197800 | -0.55404700 | 1.61774500  |
| C | -1.14269200 | 0.69776200  | 1.85869100  |
| C | 0.22010600  | 0.86456100  | 2.12660900  |
| B | -3.18782000 | -0.70184300 | 1.25460600  |
| C | -3.55078900 | -2.10215700 | 0.76368600  |
| C | -3.98201400 | 0.60254800  | 1.33915500  |
| C | -2.56400000 | -3.12620400 | 0.88787000  |
| C | -2.75508000 | -4.42852700 | 0.43414100  |
| C | -3.96005600 | -4.78004400 | -0.18792600 |
| C | -4.95124400 | -3.80633100 | -0.35232200 |
| C | -4.74537200 | -2.50639900 | 0.10989500  |
| C | -5.37887000 | 0.77826600  | 1.16355400  |
| C | -5.99535200 | 2.02825900  | 1.21781100  |
| C | -5.23779100 | 3.17555900  | 1.47360000  |
| C | -3.85929200 | 3.05221200  | 1.68679200  |
| C | -3.25782200 | 1.79867300  | 1.61761700  |
| O | -1.33484900 | -2.91039900 | 1.46145200  |
| O | -1.89546200 | 1.82367800  | 1.78851500  |
| C | -2.32835700 | -2.48458700 | -2.65840000 |
| C | -0.95100500 | 4.33753300  | 0.06482800  |
| H | 2.41432900  | -0.23109400 | 4.59479700  |
| H | 4.86482100  | -0.39312900 | 4.92558800  |
| H | 6.39240100  | -0.57580700 | 2.96198700  |
| H | 7.51012900  | -0.83095000 | 0.62000900  |
| H | 8.09068300  | -1.01013600 | -1.79600400 |
| H | 6.33491500  | -0.81472400 | -3.52676700 |
| H | 3.95562600  | -0.41988900 | -2.87184900 |
| H | 4.55397600  | 2.03668300  | 0.04969800  |
| H | 3.94240900  | 4.42429000  | -0.25646600 |
| H | 1.60573200  | 5.00404900  | -0.79297300 |
| H | -0.54881600 | -3.87663100 | -1.54793000 |
| H | 1.61919400  | -4.52253500 | -0.54440400 |
| H | 3.29335100  | -2.75344200 | -0.01394200 |
| H | -3.20547700 | 3.48469400  | -1.22887700 |
| H | -4.79121300 | 1.64569500  | -1.58870200 |
| H | -3.93773800 | -0.62131800 | -2.12285200 |



|   |             |             |             |
|---|-------------|-------------|-------------|
| H | 0.05980000  | 5.13041100  | -2.40123200 |
| H | -1.62171000 | 4.60778700  | -2.61359600 |
| H | -0.30045800 | 3.64039100  | -3.29995000 |
| H | 0.07540300  | -0.22370700 | -3.73754900 |
| H | -0.20558700 | -1.90281700 | -4.24811800 |
| H | -1.47182000 | -0.66727600 | -4.48902900 |
| H | 1.08618300  | -2.43849900 | 2.09934900  |
| H | 0.63181200  | 1.86394500  | 2.23006400  |
| H | -1.95431900 | -5.14719400 | 0.57573600  |
| H | -4.11418000 | -5.79450200 | -0.53954100 |
| H | -5.88498800 | -4.06298000 | -0.84402400 |
| H | -5.52078900 | -1.76661300 | -0.05267700 |
| H | -5.99287400 | -0.09971200 | 0.99932500  |
| H | -7.06885300 | 2.10863800  | 1.07387100  |
| H | -5.70926700 | 4.15122900  | 1.52777300  |
| H | -3.24082900 | 3.91509200  | 1.90733600  |
| H | -1.84503500 | -3.34786800 | -3.12257700 |
| H | -3.09210000 | -2.14055500 | -3.36001100 |
| H | -2.81167500 | -2.80193500 | -1.73581300 |
| H | -1.98518900 | 4.66602900  | -0.05722100 |
| H | -0.32426300 | 5.23058100  | 0.11882300  |
| H | -0.87642400 | 3.78360100  | 1.00157100  |

Cartesian Coordinates of Optimized Structures (QM part).

AC-BO (crystal), S<sub>0</sub>

|   |             |             |             |
|---|-------------|-------------|-------------|
| O | 2.00534000  | -2.28156500 | -0.80386000 |
| O | 3.01594900  | 2.04410800  | -2.57425500 |
| N | 3.92191800  | -3.70415800 | -3.92215200 |
| C | 6.69306600  | -3.17591900 | -3.07257700 |
| C | 7.97285900  | -3.94522800 | -3.43877200 |
| C | 8.07784400  | -5.10065500 | -4.20120600 |
| H | 7.18587400  | -5.58626500 | -4.58512900 |
| C | 9.35131900  | -5.60879100 | -4.47617800 |
| H | 9.45402100  | -6.51512500 | -5.06440300 |
| C | 10.49722300 | -4.93963000 | -4.02484800 |
| H | 11.47730300 | -5.32863400 | -4.27642800 |
| C | 10.38814900 | -3.77226500 | -3.26566500 |
| H | 11.27724300 | -3.25043400 | -2.92320000 |
| C | 9.11241000  | -3.29766000 | -2.94963000 |
| C | 8.68373800  | -2.13383800 | -2.15501900 |
| C | 9.46462100  | -1.22340000 | -1.44336200 |
| H | 10.54499800 | -1.32912000 | -1.41723300 |
| C | 8.82577800  | -0.18101200 | -0.76985400 |
| H | 9.40270100  | 0.53801100  | -0.19653700 |
| C | 7.43720300  | -0.05380400 | -0.83356000 |
| H | 6.94732400  | 0.76570400  | -0.31587300 |
| C | 6.63652000  | -0.97069000 | -1.54501900 |
| C | 7.27637400  | -2.03413100 | -2.19846000 |

|   |             |             |             |
|---|-------------|-------------|-------------|
| C | 5.72399400  | -4.07854200 | -2.31546300 |
| C | 6.16423600  | -4.67705700 | -1.13041600 |
| H | 7.19512200  | -4.51119400 | -0.82950300 |
| C | 5.31758800  | -5.44869400 | -0.34222500 |
| H | 5.67590800  | -5.90554000 | 0.57370200  |
| C | 3.99587600  | -5.62312300 | -0.76125000 |
| H | 3.31419600  | -6.23668100 | -0.18854200 |
| C | 3.53278700  | -5.04187400 | -1.93238300 |
| H | 2.49977400  | -5.17841600 | -2.22577700 |
| C | 4.39604400  | -4.27556800 | -2.74137600 |
| C | 4.75734200  | -2.96313400 | -4.75863600 |
| C | 4.29617000  | -2.54050700 | -6.02404700 |
| H | 3.28367100  | -2.77085700 | -6.33019400 |
| C | 5.13603600  | -1.84328500 | -6.87984700 |
| H | 4.76989700  | -1.52841800 | -7.84758800 |
| C | 6.44087100  | -1.53307900 | -6.49599500 |
| H | 7.10600200  | -1.02154000 | -7.17331100 |
| C | 6.88509900  | -1.92455200 | -5.24286800 |
| H | 7.89703400  | -1.69929100 | -4.92515200 |
| C | 6.07119000  | -2.64963000 | -4.36948000 |
| C | 2.57229300  | -3.96213200 | -4.32232800 |
| C | 2.26399300  | -5.10785100 | -5.06106200 |
| H | 3.06590700  | -5.77228000 | -5.36610000 |
| C | 0.93419300  | -5.37868500 | -5.38888100 |
| H | 0.69114800  | -6.26525400 | -5.96657600 |
| C | -0.08293000 | -4.51507300 | -4.96602400 |
| H | -1.11825300 | -4.73625700 | -5.20735500 |
| C | 0.23238600  | -3.36202500 | -4.24388200 |
| H | -0.55120500 | -2.69066000 | -3.90413400 |
| C | 1.56526900  | -3.07815300 | -3.93972300 |
| H | 1.83900300  | -2.17978100 | -3.40352300 |
| C | 5.16420200  | -0.70569100 | -1.59602800 |
| C | 4.23284900  | -1.62717800 | -1.09637700 |
| H | 4.54008300  | -2.56053700 | -0.64485900 |
| C | 2.87684600  | -1.32968800 | -1.20309500 |
| C | 2.40630300  | -0.10596500 | -1.71821400 |
| C | 3.37982300  | 0.82373800  | -2.12867000 |
| C | 4.74034000  | 0.53207300  | -2.10768600 |
| H | 5.45172500  | 1.25818400  | -2.48424700 |
| C | 0.66859700  | -2.17140400 | -1.00670200 |
| C | -0.05553700 | -3.32897100 | -0.69097800 |
| H | 0.48084800  | -4.18090300 | -0.28731400 |
| C | -1.41972800 | -3.36450200 | -0.91595900 |
| H | -1.95788300 | -4.27406100 | -0.67586500 |
| C | -2.10961500 | -2.25729900 | -1.45948000 |
| C | -1.36118700 | -1.12174800 | -1.74676200 |
| H | -1.85851900 | -0.26896700 | -2.18447900 |
| C | 0.03680100  | -1.02365600 | -1.53267800 |
| C | -3.60806200 | -2.35605700 | -1.78725200 |

|   |             |             |             |
|---|-------------|-------------|-------------|
| C | -3.75829200 | -3.07956000 | -3.14851300 |
| H | -3.25190200 | -2.51634000 | -3.93971100 |
| H | -4.81623500 | -3.17688500 | -3.41868800 |
| H | -3.31518800 | -4.08026200 | -3.10637000 |
| C | -4.35703100 | -3.16095300 | -0.69816000 |
| H | -4.12873500 | -4.22560600 | -0.76024800 |
| H | -5.43692300 | -3.04989200 | -0.81803600 |
| H | -4.09375600 | -2.81134500 | 0.30179800  |
| C | -4.27052800 | -0.96709800 | -1.89128700 |
| H | -4.12875400 | -0.39247200 | -0.97130700 |
| H | -5.34370500 | -1.09833100 | -2.05548900 |
| H | -3.87784100 | -0.38427700 | -2.73001000 |
| C | 0.61621000  | 1.60521100  | -2.35572900 |
| C | 1.71988700  | 2.44249200  | -2.62762600 |
| C | 1.54948000  | 3.78957000  | -2.97613400 |
| H | 2.42280800  | 4.40950700  | -3.12771700 |
| C | 0.27571600  | 4.30583300  | -3.09072700 |
| H | 0.16343100  | 5.35303800  | -3.33793400 |
| C | -0.87361600 | 3.51751000  | -2.86302800 |
| C | -0.67014900 | 2.19510000  | -2.48930500 |
| H | -1.52853300 | 1.58531300  | -2.24745600 |
| C | -2.26014500 | 4.15539300  | -3.04040500 |
| C | -2.52416900 | 4.37852400  | -4.54863700 |
| H | -1.73648700 | 4.99060900  | -4.99950000 |
| H | -3.48123600 | 4.89514800  | -4.68414600 |
| H | -2.56006100 | 3.42278500  | -5.08236800 |
| C | -2.30301200 | 5.52423600  | -2.31732000 |
| H | -1.95119900 | 5.41928700  | -1.28780800 |
| H | -3.32728900 | 5.91056400  | -2.30752000 |
| H | -1.67486000 | 6.26938100  | -2.81272100 |
| C | -3.38942700 | 3.27591000  | -2.46770700 |
| H | -3.46083600 | 2.31240500  | -2.98357400 |
| H | -4.34592700 | 3.79236200  | -2.58793700 |
| H | -3.24270500 | 3.09083500  | -1.40073800 |
| B | 0.93231500  | 0.18050300  | -1.87327000 |

QAC-BO (crystal), S<sub>0</sub>

|   |             |             |             |
|---|-------------|-------------|-------------|
| C | -2.70131400 | 2.13401300  | 3.39315300  |
| B | -0.15868500 | 2.31211200  | 0.41958900  |
| O | 2.05052500  | 2.76792800  | -1.37486800 |
| N | 4.67215900  | 0.58649400  | 1.75227400  |
| O | -0.65845600 | -0.48975700 | 0.86435700  |
| C | -2.85775200 | 0.72896200  | 3.44508900  |
| H | -3.52097200 | 0.29049400  | 4.18225800  |
| C | -2.17195900 | -0.11605700 | 2.59000100  |
| H | -2.28285100 | -1.19392900 | 2.64578600  |
| C | -1.30307700 | 0.42802200  | 1.62998500  |
| C | 0.33244900  | -0.14420000 | 0.01204600  |
| C | 1.03905000  | -1.17428600 | -0.59734000 |

|   |             |             |             |
|---|-------------|-------------|-------------|
| H | 0.81290300  | -2.20200300 | -0.35159600 |
| C | 2.13060400  | -0.86152300 | -1.41639900 |
| C | 2.47458500  | 0.47296600  | -1.67989400 |
| H | 3.33313800  | 0.72255100  | -2.29047300 |
| C | 1.70887100  | 1.48656600  | -1.09921000 |
| C | 0.63437600  | 1.20854400  | -0.23235400 |
| C | -0.66581000 | 7.47788900  | 0.39750200  |
| C | -1.13802000 | 1.82309400  | 1.49775000  |
| C | -1.84953700 | 2.63607500  | 2.41762200  |
| H | -1.69166600 | 3.70265000  | 2.36105600  |
| C | 0.20386000  | 3.71628400  | -0.08243900 |
| C | -0.45630600 | 4.92227700  | 0.26247800  |
| H | -1.35310000 | 4.83719100  | 0.85806000  |
| C | -0.00708300 | 6.18306800  | -0.10760200 |
| C | 1.13819200  | 6.23570600  | -0.93696100 |
| H | 1.52264500  | 7.19689700  | -1.26636100 |
| C | 1.79251400  | 5.08650700  | -1.34841600 |
| H | 2.66763800  | 5.13777100  | -1.98656100 |
| C | 1.32964600  | 3.82880900  | -0.92353200 |
| C | 2.97647600  | -2.00377600 | -1.90819700 |
| C | 2.64323900  | -2.73773400 | -3.05694900 |
| H | 1.76528900  | -2.44889500 | -3.62427000 |
| C | 3.42518600  | -3.82502600 | -3.47147100 |
| H | 3.14752100  | -4.39014200 | -4.35362200 |
| C | 4.55293700  | -4.21882200 | -2.75000800 |
| H | 5.15154600  | -5.06562100 | -3.07115300 |
| C | 4.88296100  | -3.50309900 | -1.60077100 |
| C | 5.99391700  | -3.67230100 | -0.64761700 |
| C | 7.02752900  | -4.60666100 | -0.60214200 |
| H | 7.12519400  | -5.37149500 | -1.36750100 |
| C | 7.91756900  | -4.55614000 | 0.47288000  |
| H | 8.70490700  | -5.29287100 | 0.53942100  |
| C | 7.79427300  | -3.58129900 | 1.47062100  |
| H | 8.49755300  | -3.56361700 | 2.29495700  |
| C | 6.77538600  | -2.62485500 | 1.40743400  |
| H | 6.67795600  | -1.85049900 | 2.16466500  |
| C | 5.88609700  | -2.68568300 | 0.34481700  |
| C | 4.72436000  | -1.73990800 | 0.03703100  |
| C | 4.10060700  | -2.41323700 | -1.18794900 |
| C | 3.74755300  | -1.59876200 | 1.19760200  |
| C | 2.82962000  | -2.61963700 | 1.46782400  |
| H | 2.88644900  | -3.53377300 | 0.88422400  |
| C | 1.82614800  | -2.45385100 | 2.41360800  |
| H | 1.10979800  | -3.24742100 | 2.59817500  |
| C | 1.72743000  | -1.23705500 | 3.09643400  |
| H | 0.90911100  | -1.07104400 | 3.78631600  |
| C | 2.66474000  | -0.23335600 | 2.88184600  |
| H | 2.60240400  | 0.70533600  | 3.42041700  |
| C | 3.71088700  | -0.42335200 | 1.95894400  |

|   |             |             |             |
|---|-------------|-------------|-------------|
| C | 5.24663000  | 1.32618800  | 2.80686200  |
| C | 5.34031300  | 0.80814300  | 4.10913700  |
| H | 4.91773100  | -0.16524500 | 4.33177800  |
| C | 5.98792900  | 1.53645700  | 5.10611900  |
| H | 6.06680000  | 1.12831500  | 6.10717100  |
| C | 6.55715300  | 2.77528400  | 4.81629800  |
| H | 7.06125900  | 3.34569600  | 5.58968300  |
| C | 6.47077600  | 3.27802100  | 3.51782800  |
| H | 6.90010800  | 4.24503700  | 3.30181100  |
| C | 5.81696700  | 2.57891500  | 2.49997000  |
| C | 5.65680500  | 3.11562000  | 1.07311500  |
| C | 5.83630300  | 1.94086100  | 0.11158200  |
| C | 6.42058800  | 2.05853600  | -1.14825600 |
| H | 6.85553500  | 3.00184800  | -1.45465800 |
| C | 6.41375900  | 0.98184900  | -2.04032500 |
| H | 6.80889100  | 1.08253800  | -3.04383600 |
| C | 5.85091100  | -0.22403800 | -1.65689700 |
| H | 5.81824900  | -1.05206700 | -2.35118300 |
| C | 5.29285400  | -0.38282700 | -0.38710900 |
| C | 5.27238400  | 0.70440100  | 0.48626900  |
| C | 6.63993000  | 4.25896500  | 0.77342600  |
| H | 6.44832500  | 4.66876400  | -0.22000600 |
| H | 7.67878100  | 3.91991000  | 0.82617000  |
| H | 6.50013900  | 5.07064700  | 1.48807300  |
| C | 4.20835000  | 3.65011500  | 0.87921100  |
| H | 4.03600400  | 4.50664900  | 1.53799700  |
| H | 3.46524100  | 2.87471100  | 1.09313300  |
| H | 4.07010800  | 3.96459900  | -0.15897600 |
| C | 0.37724400  | 8.30909800  | 1.18387400  |
| H | 1.21633600  | 8.59888900  | 0.54735900  |
| H | 0.76851900  | 7.73702200  | 2.02937100  |
| H | -0.08418000 | 9.22491600  | 1.57028200  |
| C | -1.19250200 | 8.31967900  | -0.78570900 |
| H | -1.95270200 | 7.75770900  | -1.33540200 |
| H | -0.38827300 | 8.59564400  | -1.47485800 |
| H | -1.65156900 | 9.24262700  | -0.41354700 |
| C | -1.85052400 | 7.19077100  | 1.33979500  |
| H | -2.24942300 | 8.14384200  | 1.69498600  |
| H | -1.54069300 | 6.60496700  | 2.21198700  |
| H | -2.65851700 | 6.65756200  | 0.82756400  |
| C | -3.14934200 | 4.52757500  | 4.18384000  |
| H | -2.08536700 | 4.73679700  | 4.34125200  |
| H | -3.71609100 | 5.11842300  | 4.91014300  |
| H | -3.42779500 | 4.87116000  | 3.18125500  |
| C | -3.08482400 | 2.65185300  | 5.83840500  |
| H | -3.39460900 | 1.63067600  | 6.07206900  |
| H | -3.59019000 | 3.31802300  | 6.54623900  |
| H | -2.00489900 | 2.73357800  | 5.99632800  |
| C | -4.98504500 | 2.81462200  | 4.19266700  |

|   |             |            |            |
|---|-------------|------------|------------|
| H | -5.28761600 | 3.13206800 | 3.19300500 |
| H | -5.55215900 | 3.39776800 | 4.92418300 |
| H | -5.26334600 | 1.76340700 | 4.31500200 |
| C | -3.46461500 | 3.02963300 | 4.38618800 |

AC-BO (thin film), S<sub>0</sub>

|   |             |             |             |
|---|-------------|-------------|-------------|
| C | 10.96306300 | 6.55597900  | -3.54598800 |
| C | 10.29620700 | 7.78032700  | -3.42518200 |
| C | 10.07159800 | 8.57920300  | -4.54516000 |
| C | 10.48631800 | 8.16733600  | -5.81471400 |
| C | 11.13027500 | 6.93818600  | -5.93798000 |
| C | 11.37197200 | 6.14130300  | -4.81029200 |
| C | 11.57129900 | 6.20102500  | -7.13510800 |
| C | 12.00532400 | 4.92674700  | -6.73430900 |
| C | 12.05781900 | 4.81864500  | -5.20464800 |
| C | 11.55305300 | 6.55493100  | -8.48516100 |
| C | 11.91894200 | 5.59268900  | -9.43116100 |
| C | 12.28669900 | 4.30150500  | -9.03077600 |
| C | 12.34144900 | 3.96475900  | -7.67253900 |
| C | 13.51661600 | 4.84085900  | -4.72894000 |
| C | 14.02580700 | 3.86485900  | -3.85740700 |
| N | 13.25610700 | 2.76165600  | -3.46335200 |
| C | 11.89023600 | 2.67967200  | -3.78061300 |
| C | 11.29537800 | 3.62205100  | -4.64283200 |
| C | 11.07270200 | 1.66450200  | -3.23373200 |
| C | 9.71426800  | 1.60899600  | -3.51784100 |
| C | 9.12609200  | 2.53966900  | -4.37806500 |
| C | 9.92888500  | 3.52823700  | -4.93328700 |
| C | 14.32194700 | 5.93191700  | -5.08000100 |
| C | 15.60174300 | 6.09553100  | -4.56539000 |
| C | 16.08612100 | 5.14894400  | -3.65715900 |
| C | 15.31213200 | 4.05263900  | -3.30578200 |
| C | 13.92256200 | 1.67849600  | -2.80881100 |
| C | 13.61892400 | 1.34964600  | -1.48849200 |
| C | 14.27145000 | 0.29304100  | -0.85381800 |
| C | 15.24808300 | -0.43515200 | -1.53578000 |
| C | 15.57508800 | -0.08874700 | -2.85151100 |
| C | 14.91979800 | 0.96658300  | -3.48456200 |
| C | 11.21911000 | 5.71183400  | -2.35106800 |
| C | 12.52063600 | 5.64461600  | -1.84827700 |
| C | 12.76895200 | 4.78652500  | -0.78667700 |
| C | 11.76018800 | 4.00005900  | -0.20640000 |
| C | 10.47488500 | 4.08069600  | -0.77324800 |
| C | 10.17643900 | 4.95081900  | -1.81121700 |
| B | 12.07470000 | 3.02687900  | 0.90676300  |
| C | 11.03466100 | 1.88737600  | 0.97668400  |
| C | 9.82014200  | 2.09452200  | 0.27660000  |

|   |             |             |              |
|---|-------------|-------------|--------------|
| O | 9.49385100  | 3.26294300  | -0.33535300  |
| O | 14.04296300 | 4.68742400  | -0.35852500  |
| C | 14.32909300 | 4.13330500  | 0.84701100   |
| C | 13.43469500 | 3.31287700  | 1.57785000   |
| C | 11.29005400 | 0.56255300  | 1.40218300   |
| C | 10.42645500 | -0.50873500 | 1.13463400   |
| C | 9.19335700  | -0.20856700 | 0.52613200   |
| C | 8.88001100  | 1.07821200  | 0.11393200   |
| C | 15.59004100 | 4.47158400  | 1.33960500   |
| C | 15.92082300 | 4.14093900  | 2.64256200   |
| C | 15.02235500 | 3.44902400  | 3.47704700   |
| C | 13.83097400 | 2.99202700  | 2.89945000   |
| C | 10.82924500 | -1.95933400 | 1.45793400   |
| C | 10.80113400 | -2.16471600 | 2.98436600   |
| C | 12.25866200 | -2.22149300 | 0.93108800   |
| C | 9.88603900  | -2.99646000 | 0.81389600   |
| C | 15.27799800 | 3.34969800  | 4.99144000   |
| C | 16.73411000 | 3.69261500  | 5.37326000   |
| C | 14.98039300 | 1.93737700  | 5.51984200   |
| C | 14.33946400 | 4.36656500  | 5.68793400   |
| H | 9.95901200  | 8.10299400  | -2.44498300  |
| H | 9.56331400  | 9.52204700  | -4.40275700  |
| H | 10.28292400 | 8.76295500  | -6.69706900  |
| H | 11.23666500 | 7.54752200  | -8.79376800  |
| H | 11.90017400 | 5.84165300  | -10.48747700 |
| H | 12.53013300 | 3.55678800  | -9.78163400  |
| H | 12.62020500 | 2.97002500  | -7.34428200  |
| H | 11.49318600 | 0.91634700  | -2.57694400  |
| H | 9.11631700  | 0.82562700  | -3.06259200  |
| H | 8.06812600  | 2.49229500  | -4.60872300  |
| H | 9.49660600  | 4.27218800  | -5.59783600  |
| H | 13.91493200 | 6.67473000  | -5.75868400  |
| H | 16.20363200 | 6.95090200  | -4.85209200  |
| H | 17.06810200 | 5.26821900  | -3.21060000  |
| H | 15.68560400 | 3.34660700  | -2.57616900  |
| H | 12.85372100 | 1.91193900  | -0.97825400  |
| H | 14.01535100 | 0.05476000  | 0.17320100   |
| H | 15.75844100 | -1.25781400 | -1.04556600  |
| H | 16.34170400 | -0.64022200 | -3.38688400  |
| H | 15.19794300 | 1.27570600  | -4.48642600  |
| H | 13.33145500 | 6.21092000  | -2.29182800  |
| H | 9.19252200  | 4.94423800  | -2.26480400  |
| H | 12.23747100 | 0.37831000  | 1.90370600   |
| H | 8.47553600  | -0.99375000 | 0.32545400   |
| H | 7.95496500  | 1.30496500  | -0.40545600  |
| H | 16.25397400 | 5.05610100  | 0.71254800   |
| H | 16.87953600 | 4.46921800  | 3.02369600   |
| H | 13.12908600 | 2.42520700  | 3.50132000   |
| H | 11.40389500 | -1.39682200 | 3.47431500   |

|   |             |             |             |
|---|-------------|-------------|-------------|
| H | 9.77593200  | -2.08506800 | 3.36033900  |
| H | 11.19555700 | -3.15022000 | 3.25557400  |
| H | 12.32763800 | -2.01325700 | -0.14139100 |
| H | 12.97941700 | -1.58365600 | 1.44486300  |
| H | 12.54272800 | -3.26370000 | 1.11135900  |
| H | 9.86982600  | -2.90270000 | -0.27692000 |
| H | 10.23685600 | -4.00031600 | 1.06984400  |
| H | 8.86339900  | -2.90290900 | 1.19049700  |
| H | 16.98367100 | 4.73243600  | 5.14292100  |
| H | 16.86483100 | 3.55487600  | 6.45122900  |
| H | 17.44440600 | 3.03724800  | 4.85761500  |
| H | 13.94391800 | 1.65122600  | 5.33632700  |
| H | 15.63160900 | 1.20142300  | 5.03672000  |
| H | 15.14998900 | 1.89932500  | 6.60066700  |
| H | 14.45541100 | 4.31044400  | 6.77642100  |
| H | 14.57074700 | 5.38621000  | 5.36277400  |
| H | 13.29511000 | 4.16549900  | 5.43527100  |

AC-BO (thin film), S<sub>1</sub>

|   |             |             |             |
|---|-------------|-------------|-------------|
| C | 10.93745800 | 6.54888800  | -3.53864500 |
| C | 10.26429900 | 7.77504900  | -3.44330200 |
| C | 10.05469700 | 8.57168800  | -4.56821500 |
| C | 10.48589900 | 8.16294200  | -5.83404500 |
| C | 11.12644300 | 6.93077500  | -5.94526900 |
| C | 11.34804000 | 6.14395100  | -4.80736000 |
| C | 11.56054800 | 6.17895400  | -7.13473800 |
| C | 11.97294700 | 4.89879200  | -6.72909800 |
| C | 12.01673000 | 4.80383800  | -5.19440800 |
| C | 11.55057800 | 6.51915500  | -8.48804200 |
| C | 11.90056000 | 5.54247500  | -9.42598000 |
| C | 12.24624900 | 4.24871800  | -9.01789500 |
| C | 12.29536900 | 3.92229700  | -7.65623600 |
| C | 13.46135600 | 4.81065300  | -4.71362300 |
| C | 13.94134800 | 3.84190900  | -3.80205900 |
| N | 13.15050600 | 2.76413900  | -3.42804900 |
| C | 11.80462700 | 2.68586400  | -3.74739500 |
| C | 11.22838500 | 3.63760200  | -4.63299200 |
| C | 10.98609800 | 1.65877100  | -3.20042800 |
| C | 9.64220600  | 1.60505800  | -3.51092500 |
| C | 9.08390300  | 2.52524300  | -4.40950300 |
| C | 9.88176200  | 3.52155700  | -4.96690400 |
| C | 14.30909100 | 5.85019900  | -5.09184400 |
| C | 15.58274700 | 5.97890500  | -4.54482100 |
| C | 16.02221000 | 5.06624800  | -3.57433300 |
| C | 15.21778100 | 4.00810400  | -3.20283600 |
| C | 13.80870700 | 1.67209900  | -2.75384300 |
| C | 13.48245100 | 1.34540600  | -1.44169200 |
| C | 14.14937600 | 0.29124000  | -0.81958400 |
| C | 15.12273300 | -0.43308500 | -1.50963600 |



|   |             |             |              |
|---|-------------|-------------|--------------|
| C | 15.45590600 | -0.08342000 | -2.82366700  |
| C | 14.81203200 | 0.98325100  | -3.44496200  |
| C | 11.19289200 | 5.70763800  | -2.34686100  |
| C | 12.49537100 | 5.62523400  | -1.83249000  |
| C | 12.74562000 | 4.75906200  | -0.77962000  |
| C | 11.73572400 | 3.99927500  | -0.16065000  |
| C | 10.45028000 | 4.09137500  | -0.73340400  |
| C | 10.15641500 | 4.93346700  | -1.79336300  |
| B | 12.04536500 | 3.03089300  | 0.96556100   |
| C | 11.03903300 | 1.86478100  | 0.97451200   |
| C | 9.82653800  | 2.06176900  | 0.24527800   |
| O | 9.45972800  | 3.29206000  | -0.25074000  |
| O | 14.04305300 | 4.58839700  | -0.40504500  |
| C | 14.32570800 | 4.12527500  | 0.86250200   |
| C | 13.42298300 | 3.31645200  | 1.60892900   |
| C | 11.27659300 | 0.52286000  | 1.37457000   |
| C | 10.42823600 | -0.55449300 | 1.05424200   |
| C | 9.24049000  | -0.27665400 | 0.36388800   |
| C | 8.94270100  | 1.03423500  | -0.03232700  |
| C | 15.56268300 | 4.51589400  | 1.34843400   |
| C | 15.92585500 | 4.20476100  | 2.66148900   |
| C | 15.04706900 | 3.49835200  | 3.49147900   |
| C | 13.84445800 | 3.02925100  | 2.93048700   |
| C | 10.81416800 | -1.99774800 | 1.43367100   |
| C | 10.78805700 | -2.14611800 | 2.96761400   |
| C | 12.23814000 | -2.30522600 | 0.91559500   |
| C | 9.85614600  | -3.05093300 | 0.83953200   |
| C | 15.31191000 | 3.38888600  | 5.00419700   |
| C | 16.76641100 | 3.74236500  | 5.38176700   |
| C | 15.03026400 | 1.96872300  | 5.52326200   |
| C | 14.36800500 | 4.38762800  | 5.71895800   |
| H | 9.91774300  | 8.10176400  | -2.46805300  |
| H | 9.54707900  | 9.51630000  | -4.43328000  |
| H | 10.29564200 | 8.75916800  | -6.71903400  |
| H | 11.24945200 | 7.51347000  | -8.80516300  |
| H | 11.88477900 | 5.78360000  | -10.48402600 |
| H | 12.47554900 | 3.49339100  | -9.76215700  |
| H | 12.55715200 | 2.92409100  | -7.32466200  |
| H | 11.39421400 | 0.92808800  | -2.51848100  |
| H | 9.02722600  | 0.84494500  | -3.04334300  |
| H | 8.03200500  | 2.46652300  | -4.66413100  |
| H | 9.45584500  | 4.24887800  | -5.65152700  |
| H | 13.94496100 | 6.58525700  | -5.80131200  |
| H | 16.21802500 | 6.80522900  | -4.84528700  |
| H | 16.98518600 | 5.19718700  | -3.09442800  |
| H | 15.53068300 | 3.34303600  | -2.41140900  |
| H | 12.73630000 | 1.91305400  | -0.90327900  |
| H | 13.89650900 | 0.05702300  | 0.20758800   |
| H | 15.63171000 | -1.25844200 | -1.02286700  |

|   |             |             |             |
|---|-------------|-------------|-------------|
| H | 16.22136000 | -0.63226900 | -3.36240400 |
| H | 15.09278000 | 1.30401200  | -4.44208000 |
| H | 13.31114000 | 6.19124800  | -2.26889500 |
| H | 9.16288300  | 4.93342200  | -2.22753300 |
| H | 12.19456300 | 0.33397300  | 1.92741900  |
| H | 8.54255400  | -1.06261100 | 0.10853200  |
| H | 8.03336600  | 1.27036400  | -0.57642800 |
| H | 16.20788500 | 5.11178900  | 0.71179500  |
| H | 16.87748900 | 4.56198600  | 3.03288700  |
| H | 13.14965800 | 2.47977100  | 3.55546600  |
| H | 11.40174100 | -1.37152400 | 3.43265300  |
| H | 9.76418500  | -2.03364100 | 3.33875100  |
| H | 11.16462600 | -3.12846800 | 3.27533700  |
| H | 12.30213500 | -2.14129300 | -0.16535900 |
| H | 12.96922700 | -1.65666000 | 1.40073500  |
| H | 12.50840600 | -3.34440500 | 1.13484800  |
| H | 9.86120400  | -3.02702700 | -0.25529700 |
| H | 10.17145100 | -4.04637200 | 1.16702300  |
| H | 8.83056200  | -2.89770600 | 1.18707500  |
| H | 17.00344400 | 4.78549900  | 5.15341000  |
| H | 16.90614200 | 3.59967300  | 6.45843300  |
| H | 17.47856300 | 3.09793300  | 4.85497200  |
| H | 13.99299600 | 1.67944200  | 5.34814600  |
| H | 15.67833200 | 1.24141900  | 5.02268600  |
| H | 15.21470100 | 1.91971300  | 6.60177600  |
| H | 14.48813400 | 4.32043400  | 6.80693600  |
| H | 14.58873700 | 5.41234800  | 5.40255400  |
| H | 13.32538400 | 4.17958500  | 5.46556400  |

AC-BO (thin film), T<sub>1</sub>

|   |             |            |             |
|---|-------------|------------|-------------|
| C | 10.91909000 | 6.56538600 | -3.55600000 |
| C | 10.26318300 | 7.79697200 | -3.44338300 |
| C | 10.04777600 | 8.59072700 | -4.56850500 |
| C | 10.46367900 | 8.17099800 | -5.83561300 |
| C | 11.09867000 | 6.93674600 | -5.95211900 |
| C | 11.32408100 | 6.14452200 | -4.81866700 |
| C | 11.54973400 | 6.19078600 | -7.13981600 |
| C | 11.97997800 | 4.91862100 | -6.72656200 |
| C | 12.01373500 | 4.82073800 | -5.19546100 |
| C | 11.54437700 | 6.53578700 | -8.49214400 |
| C | 11.91732700 | 5.56671500 | -9.42828800 |
| C | 12.28126000 | 4.27841700 | -9.01610900 |
| C | 12.32588000 | 3.95070400 | -7.65510200 |
| C | 13.46341200 | 4.85709900 | -4.69352100 |
| C | 13.94319700 | 3.92693100 | -3.75987800 |
| N | 13.14875700 | 2.85939500 | -3.31057200 |
| C | 11.80798200 | 2.74095800 | -3.69018600 |
| C | 11.24251100 | 3.63128900 | -4.63081500 |
| C | 10.97797900 | 1.74751400 | -3.11786200 |

|   |             |             |              |
|---|-------------|-------------|--------------|
| C | 9.64456900  | 1.63561200  | -3.48795700  |
| C | 9.09490600  | 2.49233000  | -4.44583000  |
| C | 9.90084300  | 3.48039400  | -5.00121200  |
| C | 14.28911500 | 5.92154300  | -5.07824500  |
| C | 15.56014200 | 6.09294500  | -4.54307200  |
| C | 16.01802400 | 5.18408800  | -3.58342600  |
| C | 15.22242800 | 4.11614500  | -3.19471200  |
| C | 13.82749900 | 1.74386300  | -2.71020600  |
| C | 13.58971200 | 1.39092600  | -1.38551700  |
| C | 14.24609600 | 0.29360700  | -0.82519200  |
| C | 15.15410000 | -0.44380700 | -1.58594300  |
| C | 15.41778500 | -0.06622600 | -2.90798900  |
| C | 14.76247300 | 1.02897900  | -3.46730300  |
| C | 11.17570200 | 5.72247900  | -2.36450500  |
| C | 12.44240600 | 5.67761500  | -1.79312100  |
| C | 12.68174300 | 4.81622300  | -0.70044500  |
| C | 11.69639400 | 3.99663300  | -0.11784700  |
| C | 10.45783900 | 4.02506900  | -0.76933100  |
| C | 10.17142100 | 4.87429900  | -1.85787500  |
| B | 12.00330300 | 3.03724300  | 1.00894200   |
| C | 11.02350300 | 1.84741600  | 0.98697300   |
| C | 9.82692000  | 2.00099200  | 0.21883900   |
| O | 9.49074500  | 3.17732400  | -0.40732600  |
| O | 13.93614700 | 4.77943200  | -0.25793000  |
| C | 14.25941000 | 4.19930100  | 0.94589000   |
| C | 13.37550200 | 3.34312600  | 1.66607100   |
| C | 11.26629300 | 0.51776300  | 1.41372900   |
| C | 10.43199400 | -0.57267300 | 1.09546300   |
| C | 9.23456400  | -0.32016700 | 0.40594500   |
| C | 8.93135400  | 0.97075800  | -0.02401700  |
| C | 15.51383400 | 4.57427800  | 1.40583600   |
| C | 15.90568100 | 4.21967600  | 2.69471500   |
| C | 15.04121100 | 3.48462300  | 3.51635500   |
| C | 13.83115400 | 3.01230300  | 2.96142000   |
| C | 10.84836800 | -2.00963300 | 1.45731500   |
| C | 10.82305700 | -2.17605000 | 2.98881500   |
| C | 12.28033400 | -2.26622100 | 0.93363100   |
| C | 9.91939100  | -3.07918200 | 0.84717900   |
| C | 15.33187800 | 3.34578500  | 5.01968700   |
| C | 16.79520500 | 3.68175500  | 5.37882900   |
| C | 15.04350700 | 1.92231200  | 5.52267600   |
| C | 14.40492700 | 4.34431900  | 5.75868000   |
| H | 9.93025500  | 8.13170800  | -2.46577900  |
| H | 9.54938300  | 9.53893600  | -4.43009700  |
| H | 10.27011500 | 8.76632900  | -6.72024700  |
| H | 11.23158900 | 7.52652100  | -8.81003500  |
| H | 11.90710200 | 5.80817400  | -10.48641200 |
| H | 12.52916400 | 3.52856800  | -9.76016400  |
| H | 12.60414000 | 2.95821200  | -7.31955900  |

|   |             |             |             |
|---|-------------|-------------|-------------|
| H | 11.37018400 | 1.06726600  | -2.37391100 |
| H | 9.03594900  | 0.87164800  | -3.01498100 |
| H | 8.05802200  | 2.39398700  | -4.74568300 |
| H | 9.49151800  | 4.17396300  | -5.73135900 |
| H | 13.90875300 | 6.63547700  | -5.80183700 |
| H | 16.17829000 | 6.92682600  | -4.85724000 |
| H | 16.99482100 | 5.31109700  | -3.12809600 |
| H | 15.56915500 | 3.43386200  | -2.42923800 |
| H | 12.88860500 | 1.96349500  | -0.79598000 |
| H | 14.04096300 | 0.03312100  | 0.20763200  |
| H | 15.66341500 | -1.29822100 | -1.15205300 |
| H | 16.13459500 | -0.62291000 | -3.50358500 |
| H | 14.99148700 | 1.36445300  | -4.47307200 |
| H | 13.27017200 | 6.24893700  | -2.20227600 |
| H | 9.20002200  | 4.80501900  | -2.33812600 |
| H | 12.18433600 | 0.34153700  | 1.96919400  |
| H | 8.54884000  | -1.11996700 | 0.16243900  |
| H | 8.03805300  | 1.18800500  | -0.60061800 |
| H | 16.13774900 | 5.19270300  | 0.76979400  |
| H | 16.86398200 | 4.56408600  | 3.05928800  |
| H | 13.16710900 | 2.42068600  | 3.57933300  |
| H | 11.41120900 | -1.38765200 | 3.46235800  |
| H | 9.79561600  | -2.10467000 | 3.36021600  |
| H | 11.23264700 | -3.14877000 | 3.28302900  |
| H | 12.34137300 | -2.08530500 | -0.14442000 |
| H | 12.99066800 | -1.60145800 | 1.42640100  |
| H | 12.57959100 | -3.29953000 | 1.14033100  |
| H | 9.91775900  | -3.03585900 | -0.24674900 |
| H | 10.27235300 | -4.06795700 | 1.15430300  |
| H | 8.89170500  | -2.97307600 | 1.20582800  |
| H | 17.03762200 | 4.72728000  | 5.16849400  |
| H | 16.94996600 | 3.51729500  | 6.44992500  |
| H | 17.49398500 | 3.04137200  | 4.82989100  |
| H | 13.99885500 | 1.64843500  | 5.36910500  |
| H | 15.67204900 | 1.19392100  | 4.99964500  |
| H | 15.25143200 | 1.85887300  | 6.59558800  |
| H | 14.54166500 | 4.25971800  | 6.84303200  |
| H | 14.62985600 | 5.37179200  | 5.45474500  |
| H | 13.35711300 | 4.14650800  | 5.51926100  |

QAC-BO (thin film), S<sub>0</sub>

|   |            |            |            |
|---|------------|------------|------------|
| C | 1.58918200 | 7.39231800 | 3.04712800 |
| C | 2.47543000 | 8.40042100 | 2.62442500 |
| C | 3.45095800 | 8.92092900 | 3.47401400 |
| C | 3.44649500 | 8.50014000 | 4.80586700 |
| C | 2.48624400 | 7.60662200 | 5.29976400 |
| C | 1.61713300 | 7.01259900 | 4.39984200 |
| B | 0.70927300 | 6.67527100 | 2.06648200 |
| C | 0.69764800 | 7.30464600 | 0.67589200 |

|   |             |             |             |
|---|-------------|-------------|-------------|
| C | 1.58642200  | 8.37137000  | 0.42704600  |
| O | 2.44441900  | 8.86575200  | 1.35683200  |
| O | 0.81029200  | 6.03419500  | 4.86483800  |
| C | 0.11388500  | 5.22452400  | 4.03031100  |
| C | 0.01146300  | 5.43367000  | 2.63852800  |
| C | -0.08612700 | 6.87679000  | -0.40548000 |
| C | 0.02021900  | 7.38939500  | -1.69306000 |
| C | 0.93878800  | 8.43810200  | -1.89346400 |
| C | 1.68938600  | 8.95014600  | -0.84109900 |
| C | -0.49785500 | 4.12831500  | 4.65020000  |
| C | -1.21943300 | 3.22022600  | 3.88818900  |
| C | -1.33335200 | 3.36379200  | 2.48963100  |
| C | -0.69989100 | 4.45801100  | 1.90863300  |
| C | -0.87523700 | 6.79831000  | -2.78921000 |
| C | -0.59391500 | 5.28136700  | -2.90025100 |
| C | -2.03290700 | 2.32205000  | 1.60393700  |
| C | -2.98418600 | 1.42956800  | 2.42527000  |
| C | 6.41430700  | 8.18123700  | 7.11334700  |
| C | 7.30219700  | 7.01342700  | 7.23677100  |
| C | 7.01952400  | 6.12722700  | 6.18754900  |
| C | 5.53883800  | 7.96740700  | 6.03660500  |
| C | 4.52078300  | 8.87996600  | 5.76435200  |
| C | 4.44365500  | 10.04814200 | 6.53161900  |
| C | 5.31390300  | 10.25364000 | 7.60557300  |
| C | 6.30185600  | 9.31719200  | 7.91275300  |
| C | 8.22190600  | 6.67440900  | 8.23009800  |
| C | 8.82690400  | 5.41642400  | 8.17492600  |
| C | 8.51873400  | 4.52134300  | 7.14200500  |
| C | 7.62183800  | 4.87801200  | 6.12894800  |
| C | -2.37014400 | 6.96992300  | -2.42424200 |
| C | -0.62381000 | 7.46805700  | -4.15151800 |
| C | -2.86671800 | 3.00498400  | 0.49482000  |
| C | -0.94135100 | 1.44824700  | 0.93969100  |
| C | 4.44503700  | 5.19217600  | 3.80834100  |
| C | 4.83583300  | 5.65682400  | 5.06952900  |
| C | 5.93303900  | 6.69571400  | 5.25719500  |
| C | 6.54042500  | 7.11081500  | 3.91017400  |
| C | 6.06353300  | 6.62034300  | 2.68003700  |
| N | 4.93851100  | 5.76493300  | 2.61806000  |
| C | 3.53908300  | 4.10455800  | 3.71810700  |
| C | 2.89941300  | 3.65419100  | 4.86785200  |
| C | 3.22643400  | 4.17305600  | 6.12303300  |
| C | 4.23129300  | 5.12128600  | 6.21192700  |
| C | 7.62414000  | 8.00269600  | 3.92642000  |
| C | 8.24997000  | 8.42516800  | 2.76355800  |
| C | 7.82071400  | 7.88907200  | 1.54775400  |
| C | 6.77427900  | 6.97813700  | 1.51161300  |
| C | 4.16937700  | 5.59227200  | 1.43280800  |
| C | 4.13443000  | 6.56013300  | 0.41573000  |

|   |             |             |             |
|---|-------------|-------------|-------------|
| C | 3.45579000  | 6.31955400  | -0.77471800 |
| C | 2.69550800  | 5.16575300  | -0.93335200 |
| C | 2.62919900  | 4.25576800  | 0.11776800  |
| C | 3.38026900  | 4.43067200  | 1.28493400  |
| C | 3.44555200  | 3.37447200  | 2.38033500  |
| C | 4.77166800  | 2.57423900  | 2.19281500  |
| C | 2.27283700  | 2.38116100  | 2.33295700  |
| H | 4.19618600  | 9.61420500  | 3.10142000  |
| H | 2.50423000  | 7.28209600  | 6.33205600  |
| H | -0.81839200 | 6.10359300  | -0.21976700 |
| H | 1.06346700  | 8.88255000  | -2.87402300 |
| H | 2.39301800  | 9.76227800  | -0.99017500 |
| H | -0.38690100 | 4.00937400  | 5.72278200  |
| H | -1.68285200 | 2.38277800  | 4.39629400  |
| H | -0.70879200 | 4.54590600  | 0.83107500  |
| H | 0.41736500  | 5.09649800  | -3.27380600 |
| H | -0.69530400 | 4.78062000  | -1.93247400 |
| H | -1.31902500 | 4.82581500  | -3.58024500 |
| H | -3.71582000 | 2.03731700  | 2.96866500  |
| H | -2.43792600 | 0.81784500  | 3.14982000  |
| H | -3.52873000 | 0.75790500  | 1.75613000  |
| H | 3.65276200  | 10.76269000 | 6.32499600  |
| H | 5.17981300  | 11.12463700 | 8.23688400  |
| H | 6.95169200  | 9.45316700  | 8.77161100  |
| H | 8.43511000  | 7.35944700  | 9.04539500  |
| H | 9.52584500  | 5.11926300  | 8.95043700  |
| H | 8.95851900  | 3.53069300  | 7.14822700  |
| H | 7.36471600  | 4.18250700  | 5.33552200  |
| H | -2.97339600 | 6.36112100  | -3.10046000 |
| H | -2.69422600 | 8.00698200  | -2.52915900 |
| H | -2.58592800 | 6.63910300  | -1.40529400 |
| H | -0.82071400 | 8.54355100  | -4.10410000 |
| H | 0.40641800  | 7.31491400  | -4.48922900 |
| H | -1.29104800 | 7.04719900  | -4.90496700 |
| H | -2.23992100 | 3.57541800  | -0.19733200 |
| H | -3.60658900 | 3.68581900  | 0.92526300  |
| H | -3.39014200 | 2.24211500  | -0.09039300 |
| H | -0.28188200 | 2.06777300  | 0.32083500  |
| H | -0.32067800 | 0.96128300  | 1.69689500  |
| H | -1.39433600 | 0.67983800  | 0.30335200  |
| H | 2.14495400  | 2.88241900  | 4.79230200  |
| H | 2.72980500  | 3.80750800  | 7.01544000  |
| H | 4.55530300  | 5.49227700  | 7.17504200  |
| H | 7.96719800  | 8.37523600  | 4.88583000  |
| H | 9.06593300  | 9.13858900  | 2.80191700  |
| H | 8.30400000  | 8.17831200  | 0.62049300  |
| H | 6.49822000  | 6.54075400  | 0.56275900  |
| H | 4.61833600  | 7.51557300  | 0.55741100  |
| H | 3.47665400  | 7.06931600  | -1.55496300 |

|   |            |            |             |
|---|------------|------------|-------------|
| H | 2.13105800 | 4.99759100 | -1.84257800 |
| H | 1.99787800 | 3.38122000 | 0.01650300  |
| H | 5.63511800 | 3.24578200 | 2.20117600  |
| H | 4.88344700 | 1.84513300 | 3.00226400  |
| H | 4.74981100 | 2.04761400 | 1.23267700  |
| H | 1.31483700 | 2.87990700 | 2.49216200  |
| H | 2.40832700 | 1.61890700 | 3.10024300  |
| H | 2.24573100 | 1.85845300 | 1.37390900  |

QAC-BO (thin film), S<sub>1</sub>

|   |             |             |             |
|---|-------------|-------------|-------------|
| C | 1.62468000  | 7.34367600  | 3.06810900  |
| C | 2.47724500  | 8.39344300  | 2.67280400  |
| C | 3.45565000  | 8.92054500  | 3.51379400  |
| C | 3.52703200  | 8.44662000  | 4.83174900  |
| C | 2.61202000  | 7.48598400  | 5.29831100  |
| C | 1.71489200  | 6.92019700  | 4.40837700  |
| B | 0.70324600  | 6.66098800  | 2.09683000  |
| C | 0.68622300  | 7.29577700  | 0.71388000  |
| C | 1.55035900  | 8.39536500  | 0.46375700  |
| O | 2.41528100  | 8.89404200  | 1.40721700  |
| O | 0.92288200  | 5.92141900  | 4.87814800  |
| C | 0.18749000  | 5.12826600  | 4.03609200  |
| C | 0.03090700  | 5.40590500  | 2.65024300  |
| C | -0.07622000 | 6.86601400  | -0.38913700 |
| C | 0.04195200  | 7.38715100  | -1.68208200 |
| C | 0.93729200  | 8.44515600  | -1.87992500 |
| C | 1.65562700  | 8.97597200  | -0.79131300 |
| C | -0.38911500 | 4.01771000  | 4.63851100  |
| C | -1.15141900 | 3.11517100  | 3.87953700  |
| C | -1.31975800 | 3.31859100  | 2.50256500  |
| C | -0.71678000 | 4.44369100  | 1.92798600  |
| C | -0.84223500 | 6.78456200  | -2.78246100 |
| C | -0.55960700 | 5.26706700  | -2.88593000 |
| C | -2.04837100 | 2.30543600  | 1.60613700  |
| C | -3.00020900 | 1.41113400  | 2.42467700  |
| C | 6.47444700  | 8.15991000  | 7.18548900  |
| C | 7.36763300  | 6.99971000  | 7.33364800  |
| C | 7.10494600  | 6.09489800  | 6.29472100  |
| C | 5.60446600  | 7.93163100  | 6.10807400  |
| C | 4.59134800  | 8.83785200  | 5.79071500  |
| C | 4.52131600  | 10.02156600 | 6.53794500  |
| C | 5.37327800  | 10.24099900 | 7.62333100  |
| C | 6.35671700  | 9.31028500  | 7.96255500  |
| C | 8.28778400  | 6.68309200  | 8.33342300  |
| C | 8.91203000  | 5.43365900  | 8.29439300  |
| C | 8.62486100  | 4.52260900  | 7.27055200  |
| C | 7.72600200  | 4.85448600  | 6.24986400  |
| C | -2.34091700 | 6.95310700  | -2.42982000 |
| C | -0.58870500 | 7.44706200  | -4.14781500 |

|   |             |             |             |
|---|-------------|-------------|-------------|
| C | -2.88947300 | 3.01041000  | 0.51651100  |
| C | -0.97766800 | 1.42844400  | 0.91244600  |
| C | 4.51959800  | 5.17988900  | 3.87173600  |
| C | 4.94633600  | 5.59667100  | 5.14841900  |
| C | 6.01975600  | 6.64908300  | 5.34936800  |
| C | 6.64513900  | 7.06659100  | 4.02104500  |
| C | 6.14264300  | 6.62713800  | 2.78012000  |
| N | 4.97850500  | 5.82590800  | 2.71784600  |
| C | 3.59058300  | 4.11007800  | 3.73849300  |
| C | 2.97860300  | 3.61373300  | 4.87627600  |
| C | 3.34613500  | 4.07514500  | 6.14410500  |
| C | 4.36217400  | 5.01026500  | 6.26870000  |
| C | 7.74778700  | 7.92779200  | 4.03916900  |
| C | 8.36694700  | 8.34854600  | 2.86974200  |
| C | 7.91970500  | 7.84701300  | 1.64404700  |
| C | 6.84849900  | 6.97065400  | 1.60089100  |
| C | 4.23358800  | 5.70258600  | 1.53089300  |
| C | 4.24298900  | 6.72713500  | 0.55602700  |
| C | 3.59692900  | 6.54474000  | -0.65101100 |
| C | 2.82086800  | 5.40261500  | -0.86359400 |
| C | 2.71327200  | 4.43926500  | 0.13973600  |
| C | 3.42365000  | 4.55351100  | 1.32966200  |
| C | 3.44753900  | 3.45384000  | 2.37458500  |
| C | 4.75038800  | 2.61516800  | 2.13725500  |
| C | 2.24606300  | 2.49660200  | 2.28980600  |
| H | 4.14208300  | 9.67596900  | 3.14587200  |
| H | 2.64422200  | 7.13814600  | 6.32299200  |
| H | -0.80210900 | 6.08404500  | -0.21815000 |
| H | 1.06712600  | 8.89999100  | -2.85417600 |
| H | 2.34305100  | 9.80518900  | -0.92612000 |
| H | -0.24362100 | 3.87146300  | 5.70427800  |
| H | -1.59721200 | 2.26724600  | 4.38382400  |
| H | -0.79542600 | 4.57729800  | 0.85921400  |
| H | 0.45470900  | 5.08077100  | -3.25463800 |
| H | -0.66804300 | 4.77404800  | -1.91534500 |
| H | -1.27936400 | 4.80538000  | -3.56813600 |
| H | -3.71658700 | 2.02266400  | 2.98329700  |
| H | -2.45198900 | 0.78967400  | 3.13894100  |
| H | -3.55874500 | 0.75100600  | 1.75497600  |
| H | 3.73506200  | 10.73393000 | 6.30788600  |
| H | 5.22767200  | 11.11984000 | 8.24122200  |
| H | 6.99430100  | 9.45980500  | 8.82821800  |
| H | 8.48756400  | 7.38046900  | 9.14131000  |
| H | 9.61191600  | 5.15625400  | 9.07624700  |
| H | 9.08395400  | 3.54095400  | 7.28814300  |
| H | 7.48852500  | 4.14476500  | 5.46296100  |
| H | -2.94121000 | 6.34723700  | -3.11267900 |
| H | -2.66130700 | 7.99161400  | -2.53318100 |
| H | -2.56150400 | 6.62183300  | -1.41244100 |



|   |             |            |             |
|---|-------------|------------|-------------|
| H | -0.78721800 | 8.52211400 | -4.10309800 |
| H | 0.44418200  | 7.29735700 | -4.47933800 |
| H | -1.25377200 | 7.02225400 | -4.90166500 |
| H | -2.26619800 | 3.57043800 | -0.18656800 |
| H | -3.60210900 | 3.70727000 | 0.96586800  |
| H | -3.44299900 | 2.26189200 | -0.06000700 |
| H | -0.32834200 | 2.05302400 | 0.28816800  |
| H | -0.34788700 | 0.93054600 | 1.65577600  |
| H | -1.44505500 | 0.66909100 | 0.27493000  |
| H | 2.19590900  | 2.87439700 | 4.78289500  |
| H | 2.85148600  | 3.68479000 | 7.02685400  |
| H | 4.69318100  | 5.33846000 | 7.24241600  |
| H | 8.10990200  | 8.28132000 | 4.99781500  |
| H | 9.20297800  | 9.03836100 | 2.91107200  |
| H | 8.41149600  | 8.13589800 | 0.72241900  |
| H | 6.55550900  | 6.54333000 | 0.65284300  |
| H | 4.69092000  | 7.68394900 | 0.78190600  |
| H | 3.60272400  | 7.33642100 | -1.38689800 |
| H | 2.23898700  | 5.30890500 | -1.77307600 |
| H | 2.05395000  | 3.59411200 | -0.00951500 |
| H | 5.64418800  | 3.24559400 | 2.16681400  |
| H | 4.83560000  | 1.84529000 | 2.91030300  |
| H | 4.69504100  | 2.13604200 | 1.15489300  |
| H | 1.30334900  | 3.01191200 | 2.47450300  |
| H | 2.36784200  | 1.69003900 | 3.01435100  |
| H | 2.20349800  | 2.02257300 | 1.30657000  |

QAC-BO (thin film), T<sub>1</sub>

|   |             |            |             |
|---|-------------|------------|-------------|
| C | 1.63751500  | 7.31739900 | 3.02482500  |
| C | 2.48337300  | 8.37269500 | 2.63830000  |
| C | 3.47944900  | 8.90562900 | 3.48449000  |
| C | 3.57574000  | 8.44134800 | 4.79632200  |
| C | 2.67062900  | 7.45515500 | 5.24839900  |
| C | 1.75389000  | 6.88565500 | 4.35360800  |
| B | 0.69944500  | 6.65360500 | 2.06883700  |
| C | 0.68088000  | 7.29592000 | 0.68828600  |
| C | 1.55672500  | 8.38798400 | 0.44109500  |
| O | 2.41211500  | 8.88262500 | 1.39713300  |
| O | 0.98864300  | 5.89406400 | 4.83051500  |
| C | 0.22685600  | 5.10556100 | 4.00660200  |
| C | 0.04047200  | 5.39651500 | 2.62515400  |
| C | -0.08435200 | 6.88194100 | -0.41083000 |
| C | 0.04119400  | 7.41045500 | -1.70071600 |
| C | 0.95084800  | 8.45938300 | -1.89578200 |
| C | 1.67714600  | 8.97497400 | -0.81094100 |
| C | -0.33121100 | 3.99180300 | 4.62286400  |
| C | -1.10307200 | 3.09570600 | 3.87511400  |
| C | -1.30116900 | 3.30977400 | 2.49879900  |
| C | -0.71784900 | 4.43877100 | 1.91432500  |

|   |             |             |             |
|---|-------------|-------------|-------------|
| C | -0.84113500 | 6.81408200  | -2.80393400 |
| C | -0.55994700 | 5.29568500  | -2.90466100 |
| C | -2.04026200 | 2.29624700  | 1.61374300  |
| C | -2.99477600 | 1.41354700  | 2.44216300  |
| C | 6.48083300  | 8.17511600  | 7.19036800  |
| C | 7.37249200  | 7.01501100  | 7.35338600  |
| C | 7.12085600  | 6.10973900  | 6.31184400  |
| C | 5.63451100  | 7.94255000  | 6.09566600  |
| C | 4.62369400  | 8.84591000  | 5.76742700  |
| C | 4.52400000  | 10.02771700 | 6.51440500  |
| C | 5.35950200  | 10.25227300 | 7.61152800  |
| C | 6.34133700  | 9.32496300  | 7.96519900  |
| C | 8.28285400  | 6.70453900  | 8.36411900  |
| C | 8.91356600  | 5.45838700  | 8.33168300  |
| C | 8.64090800  | 4.54663800  | 7.30370500  |
| C | 7.74980200  | 4.87287500  | 6.27478200  |
| C | -2.34002700 | 6.98808000  | -2.45201900 |
| C | -0.58103300 | 7.47532800  | -4.16862800 |
| C | -2.87959900 | 2.99779400  | 0.52018200  |
| C | -0.96994100 | 1.41337800  | 0.92588800  |
| C | 4.55143000  | 5.20876500  | 3.85291900  |
| C | 4.96263700  | 5.62108700  | 5.13632500  |
| C | 6.05447500  | 6.65982200  | 5.34743500  |
| C | 6.69643800  | 7.06869800  | 4.01682900  |
| C | 6.19137600  | 6.64547200  | 2.77436500  |
| N | 5.02104300  | 5.84523900  | 2.69985500  |
| C | 3.64450900  | 4.12057800  | 3.72445800  |
| C | 3.03196000  | 3.61726100  | 4.86252800  |
| C | 3.38673500  | 4.07011300  | 6.13814800  |
| C | 4.38846100  | 5.01539100  | 6.26120700  |
| C | 7.82066600  | 7.90616800  | 4.05619800  |
| C | 8.45945800  | 8.33396300  | 2.90183800  |
| C | 7.99833800  | 7.86235200  | 1.67147100  |
| C | 6.90673100  | 7.00714400  | 1.61071700  |
| C | 4.27434200  | 5.69246700  | 1.49478000  |
| C | 4.25491800  | 6.69844100  | 0.51532500  |
| C | 3.58380700  | 6.50628200  | -0.68462300 |
| C | 2.81513100  | 5.36196600  | -0.88381100 |
| C | 2.74712800  | 4.40702900  | 0.12485800  |
| C | 3.49003100  | 4.53507400  | 1.30268800  |
| C | 3.53157300  | 3.44229400  | 2.36220800  |
| C | 4.84228100  | 2.62077100  | 2.14764400  |
| C | 2.34012300  | 2.47007600  | 2.28181200  |
| H | 4.16314400  | 9.65519700  | 3.09864400  |
| H | 2.69707000  | 7.10489800  | 6.27274200  |
| H | -0.81162300 | 6.10016000  | -0.24603300 |
| H | 1.08841500  | 8.91065500  | -2.87040200 |
| H | 2.37847900  | 9.79281400  | -0.94118000 |
| H | -0.14740600 | 3.83500200  | 5.68090100  |

|   |             |             |             |
|---|-------------|-------------|-------------|
| H | -1.53023300 | 2.23812200  | 4.37852000  |
| H | -0.81808900 | 4.57597300  | 0.84820900  |
| H | 0.45432100  | 5.10705600  | -3.27020200 |
| H | -0.67057900 | 4.80087400  | -1.93553900 |
| H | -1.28121600 | 4.83852300  | -3.58773900 |
| H | -3.70241000 | 2.03245800  | 3.00397100  |
| H | -2.44925900 | 0.78604200  | 3.15277800  |
| H | -3.56391000 | 0.75799200  | 1.77728400  |
| H | 3.73539900  | 10.73473800 | 6.27523200  |
| H | 5.20185100  | 11.13142900 | 8.22597800  |
| H | 6.96317300  | 9.47856100  | 8.84165200  |
| H | 8.47349100  | 7.40453200  | 9.17215800  |
| H | 9.60863200  | 5.18494000  | 9.11927000  |
| H | 9.10948900  | 3.56919800  | 7.32316800  |
| H | 7.52492100  | 4.16481300  | 5.48270500  |
| H | -2.93804500 | 6.36653900  | -3.12190100 |
| H | -2.66319600 | 8.02343100  | -2.57709100 |
| H | -2.56158600 | 6.67588400  | -1.42890700 |
| H | -0.77469900 | 8.55147500  | -4.12624100 |
| H | 0.45115600  | 7.31864200  | -4.49858900 |
| H | -1.24667200 | 7.05244000  | -4.92314500 |
| H | -2.25477900 | 3.54137400  | -0.19402000 |
| H | -3.58565000 | 3.70573800  | 0.96308600  |
| H | -3.44135200 | 2.24665000  | -0.04416100 |
| H | -0.31149400 | 2.03248900  | 0.30610300  |
| H | -0.34785400 | 0.90968000  | 1.67089400  |
| H | -1.44188500 | 0.65854400  | 0.28690900  |
| H | 2.26134900  | 2.86507300  | 4.76342400  |
| H | 2.90644300  | 3.65611100  | 7.01822000  |
| H | 4.73313600  | 5.33192900  | 7.23499200  |
| H | 8.18401200  | 8.23412900  | 5.02408200  |
| H | 9.30909600  | 9.00575100  | 2.95775400  |
| H | 8.49110700  | 8.16043700  | 0.75241100  |
| H | 6.60138700  | 6.61936700  | 0.64976600  |
| H | 4.73599800  | 7.64781300  | 0.70029100  |
| H | 3.59549000  | 7.28876200  | -1.43180600 |
| H | 2.23034000  | 5.24759400  | -1.78934000 |
| H | 2.10323500  | 3.54659800  | -0.00774700 |
| H | 5.72414900  | 3.26718400  | 2.17774000  |
| H | 4.93579900  | 1.86020700  | 2.92999700  |
| H | 4.80736400  | 2.12970900  | 1.16949900  |
| H | 1.39045200  | 2.97580200  | 2.46569900  |
| H | 2.46580200  | 1.66692500  | 3.00990800  |
| H | 2.30147200  | 1.99137400  | 1.30055200  |

## References

1. Z. Zhao, C. Zeng, X. Peng, Y. Liu, H. Zhao, L. Hua, S. J. Su, S. Yan and Z. Ren, *Angew. Chem. Int. Ed.*, 2022, **61**, e202210864.
2. Z. Wei, S. Lin, T. Zuo, Q. Li, S. Jiang, F. Qi, M. Yang, J. Gu, L. Meng and C. Z. Lu, *Phys. Chem. Chem. Phys.*, 2021, **23**, 25789-25796.
3. Y.-J. Gao, G. Y. Jung, W.-K. Chen, G. Cui and S. K. Kwak, *J. Phys. Chem. C*, 2022, **127**, 672-681.
4. W. Humphrey, A. Dalke and K. Schulten, *J. Mol. Graph. Model.*, 1996, **14**, 33-38.
5. T. Lu and Q. Chen, *J. Comput. Chem.*, 2022, **43**, 539-555.
6. X. Wang, H. Zou, H. Liu, Q. Mu, K. Zhang, Y. Xu and J. Fan, *Phys. Chem. Chem. Phys.*, 2023, **25**, 10977-10990.
7. Z. Liu, T. Lu and Q. Chen, *Carbon*, 2020, **165**, 461-467.
8. T. Lu and F. Chen, *J. Comput. Chem.*, 2012, **33**, 580-592.
9. K. Zhang, Y. Zhang, Y. Ma, J. Fan, C.-K. Wang and L. Lin, *J. Phys. Chem. A*, 2020, **124**, 8540-8550.
10. Y. Niu, W. Li, Q. Peng, H. Geng, Y. Yi, L. Wang, G. Nan, D. Wang and Z. Shuai, *Mol. Phys.*, 2018, **116**, 1078-1090.
11. Q. Peng, Y. Niu, Q. Shi, X. Gao and Z. Shuai, *J. Chem. Theory Comput.*, 2013, **9**, 1132-1143.
12. Y. Niu, Q. Peng, C. Deng, X. Gao and Z. Shuai, *J. Phys. Chem. A* 2010, **114**, 7817-7831.
13. X.-W. Sun, L.-Y. Peng, Y.-J. Gao, J.-T. Ye and G. Cui, *New J. Chem.*, 2022, **46**, 15678-15685.
